# Supplementary material for: Cycloaddition of CO2 with epoxides into cyclic carbonates catalyzed by a binary organocatalyst under mild conditions
Source: Royal Society of Chemistry journal article supplement (doi:10.1039/d4cy00639a), 2024-01-01
Supplement: d4cy00639a1.pdf [file d4cy00639a1.pdf]

# Supporting Information

For

## **Cycloaddition of CO<sub>2</sub> with epoxides into cyclic carbonates catalyzed by binary organocatalyst under mild conditions**

Wen-Wang Yu, Xiang-Guang Meng\*, Zi-Yu Gan, Wen Li, Yu-Lian Zhang, Jie Zhou

*Key Laboratory of Green Chemistry and Technology Ministry of Education, College of Chemistry, Sichuan University, Chengdu 610064, P.R. China*

\*Corresponding Author.

Email address: [mengxgchem@163.com](mailto:mengxgchem@163.com)

# Table of Contents

|                                                                                                                  |            |
|------------------------------------------------------------------------------------------------------------------|------------|
| <b>Experimental section</b>                                                                                      | Page S4-S5 |
| <b>Fig. S1.</b> <sup>1</sup> H NMR spectrum of fresh and recycled binary organocatalyst (400 MHz, DMSO, 298 K).  | Page S6    |
| <b>Fig. S2.</b> <sup>13</sup> C NMR spectrum of fresh and recycled binary organocatalyst (126 MHz, DMSO, 298 K). | Page S6    |
| <b>Fig. S3.</b> FT-IR spectra of fresh and recycled binary organocatalyst.                                       | Page S7    |
| <b>Fig. S4.</b> <sup>1</sup> H NMR spectrum of <b>4a</b> (400 MHz, CDCl <sub>3</sub> , 298 K).                   | Page S8    |
| <b>Fig. S5.</b> <sup>13</sup> C NMR spectrum of <b>4a</b> (126 MHz, CDCl <sub>3</sub> , 298 K).                  | Page S8    |
| <b>Fig. S6.</b> <sup>1</sup> H NMR spectrum of <b>4b</b> (400 MHz, CDCl <sub>3</sub> , 298 K).                   | Page S9    |
| <b>Fig. S7.</b> <sup>13</sup> C NMR spectrum of <b>4b</b> (126 MHz, CDCl <sub>3</sub> , 298 K).                  | Page S9    |
| <b>Fig. S8.</b> <sup>1</sup> H NMR spectrum of <b>4c</b> (400 MHz, CDCl <sub>3</sub> , 298 K).                   | Page S10   |
| <b>Fig. S9.</b> <sup>13</sup> C NMR spectrum of <b>4c</b> (126 MHz, CDCl <sub>3</sub> , 298 K).                  | Page S10   |
| <b>Fig. S10.</b> <sup>1</sup> H NMR spectrum of <b>4d</b> (400 MHz, CDCl <sub>3</sub> , 298 K).                  | Page S11   |
| <b>Fig. S11.</b> <sup>13</sup> C NMR spectrum of <b>4d</b> (126 MHz, CDCl <sub>3</sub> , 298 K).                 | Page S11   |
| <b>Fig. S12.</b> <sup>1</sup> H NMR spectrum of <b>4e</b> (400 MHz, CDCl <sub>3</sub> , 298 K).                  | Page S12   |
| <b>Fig. S13.</b> <sup>13</sup> C NMR spectrum of <b>4e</b> (126 MHz, CDCl <sub>3</sub> , 298 K).                 | Page S12   |
| <b>Fig. S14.</b> <sup>1</sup> H NMR spectrum of <b>4f</b> (400 MHz, CDCl <sub>3</sub> , 298 K).                  | Page S13   |
| <b>Fig. S15.</b> <sup>13</sup> C NMR spectrum of <b>4f</b> (126 MHz, CDCl <sub>3</sub> , 298 K).                 | Page S13   |
| <b>Fig. S16.</b> <sup>1</sup> H NMR spectrum of <b>4g</b> (400 MHz, CDCl <sub>3</sub> , 298 K).                  | Page S14   |
| <b>Fig. S17.</b> <sup>13</sup> C NMR spectrum of <b>4g</b> (126 MHz, CDCl <sub>3</sub> , 298 K).                 | Page S14   |
| <b>Fig. S18.</b> <sup>1</sup> H NMR spectrum of <b>4h</b> (400 MHz, CDCl <sub>3</sub> , 298 K).                  | Page S15   |
| <b>Fig. S19.</b> <sup>13</sup> C NMR spectrum of <b>4h</b> (126 MHz, CDCl <sub>3</sub> , 298 K).                 | Page S15   |
| <b>Fig. S20.</b> <sup>1</sup> H NMR spectrum of <b>4i</b> (400 MHz, CDCl <sub>3</sub> , 298 K).                  | Page S16   |
| <b>Fig. S21.</b> <sup>13</sup> C NMR spectrum of <b>4i</b> (126 MHz, CDCl <sub>3</sub> , 298 K).                 | Page S16   |
| <b>Fig. S22.</b> <sup>1</sup> H NMR spectrum of <b>4j</b> (400 MHz, CDCl <sub>3</sub> , 298 K).                  | Page S17   |
| <b>Fig. S23.</b> <sup>13</sup> C NMR spectrum of <b>4j</b> (126 MHz, CDCl <sub>3</sub> , 298 K).                 | Page S17   |
| <b>Fig. S24.</b> <sup>1</sup> H NMR spectrum of <b>4k</b> (400 MHz, CDCl <sub>3</sub> , 298 K).                  | Page S18   |
| <b>Fig. S25.</b> <sup>13</sup> C NMR spectrum of <b>4k</b> (126 MHz, CDCl <sub>3</sub> , 298 K).                 | Page S18   |
| <b>Fig. S26.</b> <sup>1</sup> H NMR spectrum of <b>4l</b> (400 MHz, CDCl <sub>3</sub> , 298 K).                  | Page S19   |
| <b>Fig. S27.</b> <sup>13</sup> C NMR spectrum of <b>4l</b> (126 MHz, CDCl <sub>3</sub> , 298 K).                 | Page S19   |
| <b>Fig. S28.</b> <sup>1</sup> H NMR spectrum of <b>4m</b> (400 MHz, CDCl <sub>3</sub> , 298 K).                  | Page S20   |
| <b>Fig. S29.</b> <sup>13</sup> C NMR spectrum of <b>4m</b> (126 MHz, CDCl <sub>3</sub> , 298 K).                 | Page S20   |
| <b>Fig. S30.</b> <sup>1</sup> H NMR spectrum of <b>6a</b> (400 MHz, CDCl <sub>3</sub> , 298 K).                  | Page S21   |
| <b>Fig. S31.</b> <sup>13</sup> C NMR spectrum of <b>6a</b> (126 MHz, CDCl <sub>3</sub> , 298 K).                 | Page S21   |
| <b>Fig. S32.</b> <sup>1</sup> H NMR spectrum of <b>6b</b> (400 MHz, CDCl <sub>3</sub> , 298 K).                  | Page S22   |
| <b>Fig. S33.</b> <sup>13</sup> C NMR spectrum of <b>6b</b> (126 MHz, CDCl <sub>3</sub> , 298 K).                 | Page S22   |
| <b>Fig. S34.</b> <sup>1</sup> H NMR spectrum of <b>6c</b> (400 MHz, CDCl <sub>3</sub> , 298 K).                  | Page S23   |
| <b>Fig. S35.</b> <sup>13</sup> C NMR spectrum of <b>6c</b> (126 MHz, CDCl <sub>3</sub> , 298 K).                 | Page S23   |
| <b>Fig. S36.</b> <sup>1</sup> H NMR spectrum of <b>6d</b> (400 MHz, DMSO, 298 K).                                | Page S24   |
| <b>Fig. S37.</b> <sup>13</sup> C NMR spectrum of <b>6d</b> (126 MHz, DMSO, 298 K).                               | Page S24   |
| <b>Fig. S38.</b> <sup>1</sup> H NMR spectrum of <b>6e</b> (400 MHz, CDCl <sub>3</sub> , 298 K).                  | Page S25   |

|                                                                                                |          |
|------------------------------------------------------------------------------------------------|----------|
| <b>Fig. S39.</b> $^{13}\text{C}$ NMR spectrum of <b>6e</b> (126 MHz, $\text{CDCl}_3$ , 298 K). | Page S25 |
| <b>Fig. S40.</b> $^1\text{H}$ NMR spectrum of <b>6f</b> (400 MHz, $\text{CDCl}_3$ , 298 K).    | Page S26 |
| <b>Fig. S41.</b> $^{13}\text{C}$ NMR spectrum of <b>6f</b> (126 MHz, $\text{CDCl}_3$ , 298 K). | Page S26 |
| <b>Fig. S42.</b> $^1\text{H}$ NMR spectrum of <b>6g</b> (400 MHz, $\text{CDCl}_3$ , 298 K).    | Page S27 |
| <b>Fig. S43.</b> $^{13}\text{C}$ NMR spectrum of <b>6g</b> (126 MHz, $\text{CDCl}_3$ , 298 K). | Page S27 |
| <b>Fig. S44.</b> $^1\text{H}$ NMR spectrum of <b>6h</b> (400 MHz, $\text{CDCl}_3$ , 298 K).    | Page S28 |
| <b>Fig. S45.</b> $^{13}\text{C}$ NMR spectrum of <b>6h</b> (126 MHz, $\text{CDCl}_3$ , 298 K). | Page S28 |
| <b>Fig. S46.</b> $^1\text{H}$ NMR spectrum of <b>6i</b> (400 MHz, $\text{CDCl}_3$ , 298 K).    | Page S29 |
| <b>Fig. S47.</b> $^{13}\text{C}$ NMR spectrum of <b>6i</b> (126 MHz, $\text{CDCl}_3$ , 298 K). | Page S29 |
| <b>Fig. S48.</b> $^1\text{H}$ NMR spectrum of <b>6j</b> (400 MHz, $\text{CDCl}_3$ , 298 K).    | Page S30 |
| <b>Fig. S49.</b> $^{13}\text{C}$ NMR spectrum of <b>6j</b> (126 MHz, $\text{CDCl}_3$ , 298 K). | Page S30 |
| <b>Fig. S50.</b> $^1\text{H}$ NMR spectrum of <b>6k</b> (400 MHz, $\text{CDCl}_3$ , 298 K).    | Page S31 |
| <b>Fig. S51.</b> $^{13}\text{C}$ NMR spectrum of <b>6k</b> (126 MHz, $\text{CDCl}_3$ , 298 K). | Page S31 |
| <b>Fig. S52.</b> $^1\text{H}$ NMR spectrum of <b>6l</b> (400 MHz, $\text{CDCl}_3$ , 298 K).    | Page S32 |
| <b>Fig. S53.</b> $^{13}\text{C}$ NMR spectrum of <b>6l</b> (126 MHz, $\text{CDCl}_3$ , 298 K). | Page S32 |
| <b>Fig. S54.</b> $^1\text{H}$ NMR spectrum of <b>6m</b> (400 MHz, $\text{CDCl}_3$ , 298 K).    | Page S33 |
| <b>Fig. S55.</b> $^{13}\text{C}$ NMR spectrum of <b>6m</b> (126 MHz, $\text{CDCl}_3$ , 298 K). | Page S33 |
| <b>Fig. S56.</b> $^1\text{H}$ NMR spectrum of <b>6n</b> (400 MHz, $\text{CDCl}_3$ , 298 K).    | Page S34 |
| <b>Fig. S57.</b> $^{13}\text{C}$ NMR spectrum of <b>6n</b> (126 MHz, $\text{CDCl}_3$ , 298 K). | Page S34 |
| <b>Fig. S58.</b> $^1\text{H}$ NMR spectrum of <b>6o</b> (400 MHz, DMSO, 298 K).                | Page S35 |
| <b>Fig. S59.</b> $^{13}\text{C}$ NMR spectrum of <b>6o</b> (126 MHz, DMSO, 298 K).             | Page S35 |
| <b>Fig. S60.</b> $^1\text{H}$ NMR spectrum of <b>6p</b> (400 MHz, $\text{CDCl}_3$ , 298 K).    | Page S36 |
| <b>Fig. S61.</b> $^{13}\text{C}$ NMR spectrum of <b>6p</b> (126 MHz, $\text{CDCl}_3$ , 298 K). | Page S36 |
| <b>Fig. S62.</b> $^1\text{H}$ NMR spectrum of <b>8a</b> (400 MHz, $\text{CDCl}_3$ , 298 K).    | Page S37 |
| <b>Fig. S63.</b> $^{13}\text{C}$ NMR spectrum of <b>8a</b> (126 MHz, $\text{CDCl}_3$ , 298 K). | Page S37 |
| <b>Fig. S64.</b> $^1\text{H}$ NMR spectrum of <b>8b</b> (400 MHz, $\text{CDCl}_3$ , 298 K).    | Page S38 |
| <b>Fig. S65.</b> $^{13}\text{C}$ NMR spectrum of <b>8b</b> (126 MHz, $\text{CDCl}_3$ , 298 K). | Page S38 |
| <b>Fig. S66.</b> $^1\text{H}$ NMR spectrum of <b>8c</b> (400 MHz, $\text{CDCl}_3$ , 298 K).    | Page S39 |
| <b>Fig. S67.</b> $^{13}\text{C}$ NMR spectrum of <b>8c</b> (126 MHz, $\text{CDCl}_3$ , 298 K). | Page S39 |
| <b>Fig. S68.</b> $^1\text{H}$ NMR spectrum of <b>8d</b> (400 MHz, $\text{CDCl}_3$ , 298 K).    | Page S40 |
| <b>Fig. S69.</b> $^{13}\text{C}$ NMR spectrum of <b>8d</b> (126 MHz, $\text{CDCl}_3$ , 298 K). | Page S40 |
| <b>Fig. S70.</b> $^1\text{H}$ NMR spectrum of <b>8e</b> (400 MHz, $\text{CDCl}_3$ , 298 K).    | Page S41 |
| <b>Fig. S71.</b> $^{13}\text{C}$ NMR spectrum of <b>8e</b> (126 MHz, $\text{CDCl}_3$ , 298 K). | Page S41 |
| <b>Fig. S72.</b> $^1\text{H}$ NMR spectrum of <b>8f</b> (400 MHz, $\text{CDCl}_3$ , 298 K).    | Page S42 |
| <b>Fig. S73.</b> $^{13}\text{C}$ NMR spectrum of <b>8f</b> (126 MHz, $\text{CDCl}_3$ , 298 K). | Page S42 |

# Experimental section

## 1.1 Materials.

Epichlorohydrin, epibromohydrin, 1,2-Epoxyhexane, 3,4-epoxy-1-butene, 1,2-epoxy-5-hexene, 2-(oxiran-2-ylmethyl)isoindoline-1,3-dione, Isobutylene oxide, 2-(chloromethyl)-2-methyloxirane, glycidol, tert-butyl glycidyl ether, allyl glycidyl ether, glycidyl phenyl ether, benzyl glycidyl ether, furfuryl glycidyl ether, butyl glycidyl ether, 2-ethylhexyl glycidyl ether, glycidyl methacrylate, 1,2-epoxy-4-vinylcyclohexane, 3,4-epoxytetrahydrofuran, 3-boc-6-oxa-3-aza-bicyclo[3.1.0]hexane, trans-stilbene oxide, tetrabutylammonium formate, tetrabutylammonium triflate, 3-hydroxybenzylamine, 2-hydroxybenzylamine, 4-hydroxybenzylamine, propylene oxide, 1,2-epoxybutane, styrene oxide, 1,2-epoxydodecane, cyclopentene oxide, cyclohexene oxide, tetraethylammonium iodide, tetrabutylammonium iodide (*n*-Bu<sub>4</sub>NI), tetramethylammonium iodide, tetraheptylammonium iodide, tetrabutylammonium hexafluorophosphate, tetrabutylammonium tetrafluoroborate, tetrabutylammonium bromide, tetrabutylammonium chloride, benzylamine, phenol were purchased from Aladdin Reagent. Ethylene glycol diglycidyl ether (epoxy value: 0.7 mol/100 g), 1,6-Hexanediol diglycidyl ether (epoxy value: 0.65-0.7 mol/100 g), neopentyl glycol diglycidyl ether (epoxy value: 0.68-0.75 mol/100 g), 1,4-Bis ((2,3-epoxypropoxy) methyl) cyclohexane (98%), resorcinol diglycidyl ether (epoxy value: 0.75-0.85 mol/100 g), 2,2-Bis(4-glycidyoxyphenyl)propane (epoxy value: 0.38-0.45 mol/100 g), Trimethylolpropane triglycidyl ether (epoxy value: 0.68-0.74 mol/100 g) were purchased from Adamas Reagent. All reagents were analytical grade and used without further purification. Distilled water was obtained from an in-house supply. Pure CO<sub>2</sub> (99.999%), N<sub>2</sub> (99.999%) and actual flue gas (14.5% CO<sub>2</sub>, 2% H<sub>2</sub>O, 1.5% O<sub>2</sub>, 300 ppm CO, 207 ppm SO<sub>x</sub>, 300 ppm NO<sub>x</sub> and the other component was N<sub>2</sub>) are supplied by Sichuan Chengdu Qiaoyuan Gas Company.

## 1.2 Instrumentation.

<sup>1</sup>H NMR spectra were recorded at ambient temperature using a Bruker Avance III 400 spectrometer (<sup>1</sup>H NMR 400 MHz, <sup>13</sup>C NMR 100 MHz). Fourier transform infrared (FT-IR) spectra were recorded on a Bruker Alpha spectrometer.

## 1.3 Experimental methods

### 1.3.1 General procedure for Cycloaddition reaction of CO<sub>2</sub> with terminal epoxides and glycerol derivatives.

Typically, epoxide (37.5 mmol), *n*-Bu<sub>4</sub>NI (1.125 mmol) and 3-hydroxybenzylamine (1.125 mmol) were put into round-bottomed flask and stirred. After filling with carbon dioxide gas three times, the reaction bottle was connected to a balloon filled with carbon dioxide gas (1 atm) and sealed. After completing the reaction at 50 °C for 8 h, 20 μL of the reaction solution was taken out and dissolved in CDCl<sub>3</sub>. The reaction solution was analyzed using nuclear magnetic resonance, and the conversion of epichlorohydrin and the selectivity of the carbonate were quantitatively calculated.

### 1.3.2 General procedure for Cycloaddition reaction of CO<sub>2</sub> with internal epoxides.

Typically, internal epoxide (37.5 mmol), *n*-Bu<sub>4</sub>NI (1.125 mmol) and 3-hydroxybenzylamine (1.125 mmol) were put into stainless steel high-pressure autoclave equipped with stirring. The reactor was purged three times with CO<sub>2</sub>, filled with 12 atm CO<sub>2</sub> and sealed. The reaction solution was heated to 110 °C and stirred at 300 r·min<sup>-1</sup> for 18 h. After the reaction was completed, the high-pressure autoclave was cooled to room temperature and the remaining CO<sub>2</sub> is slowly discharged from the reactor. The other steps were the same as above.

### 1.3.3 General procedure for the cycloaddition reaction of 3a and CO<sub>2</sub> from simulated flue gas.

Typically, epichlorohydrin (37.5 mmol), *n*-Bu<sub>4</sub>NI (1.125 mmol), and 3-hydroxybenzylamine (1.125 mmol) were mixed in round bottom flask. After blowing three times with different volume fractions of CO<sub>2</sub>, the reaction bottle is connected to a balloon filled with different volume proportions of CO<sub>2</sub> and N<sub>2</sub> (1 atm) and sealed at room temperature. The reaction was carried out at 60 °C for 8 h. The other steps were the same as above.

### 1.3.4 General procedure for the cycloaddition reaction of **3a** and CO<sub>2</sub> from actual flue gas.

Typically, epichlorohydrin (37.5 mmol), *n*-Bu<sub>4</sub>NI (1.125 mmol), and 3-hydroxybenzylamine (1.125 mmol) are mixed in round bottom flask. After blowing three times with flue gas, the reaction bottle is connected to a balloon filled with flue gas (12648 cm<sup>3</sup>) and sealed at 1 atm. The reaction was carried out at 60 °C for 10 h. The other reaction processes were similar to the above.

### 1.3.5 The molar amplification reaction of **3a** in actual flue gas.

Typically, epichlorohydrin (375 mmol), *n*-Bu<sub>4</sub>NI (11.25 mmol), and 3-hydroxybenzylamine (11.25 mmol) are mixed in round bottom flask. After blowing three times with flue gas, the reaction bottle is connected to a balloon filled with actual flue gas (63269 cm<sup>3</sup>) and sealed at room temperature. The reaction was carried out at 70 °C and 1 atm for 14 h. The measurements of reactants and products were performed by NMR analysis.

### 1.3.6 The reusability of catalysts.

1,2-epoxybutane, **1a** and **2c** were mixed into round-bottomed flask, purged three times with CO<sub>2</sub> gas, and connected to a balloon filled with CO<sub>2</sub> gas. Reaction was carried out at 50 °C and 1 atm CO<sub>2</sub> for 8 h. After the reaction was completed, 20 μL of reaction solution was extracted and dissolved in CDCl<sub>3</sub> for NMR spectroscopy analysis to obtain the yield of cyclic carbonate. The reaction solution was distilled under reduced pressure (76–79 °C, 2.0 mm Hg) to obtain the recovered binary organocatalyst. Since **1a** is dissolved in ethyl acetate and **2c** is insoluble in ethyl acetate, **2c** was obtained by heating and filtration after adding ethyl acetate and then the ethyl acetate solution was evaporated by rotation to get **1a**. Pure **1a** and **2c** were obtained by vacuum drying. The recovered catalyst was directly used for the next catalytic run and the procedure was repeated five times.

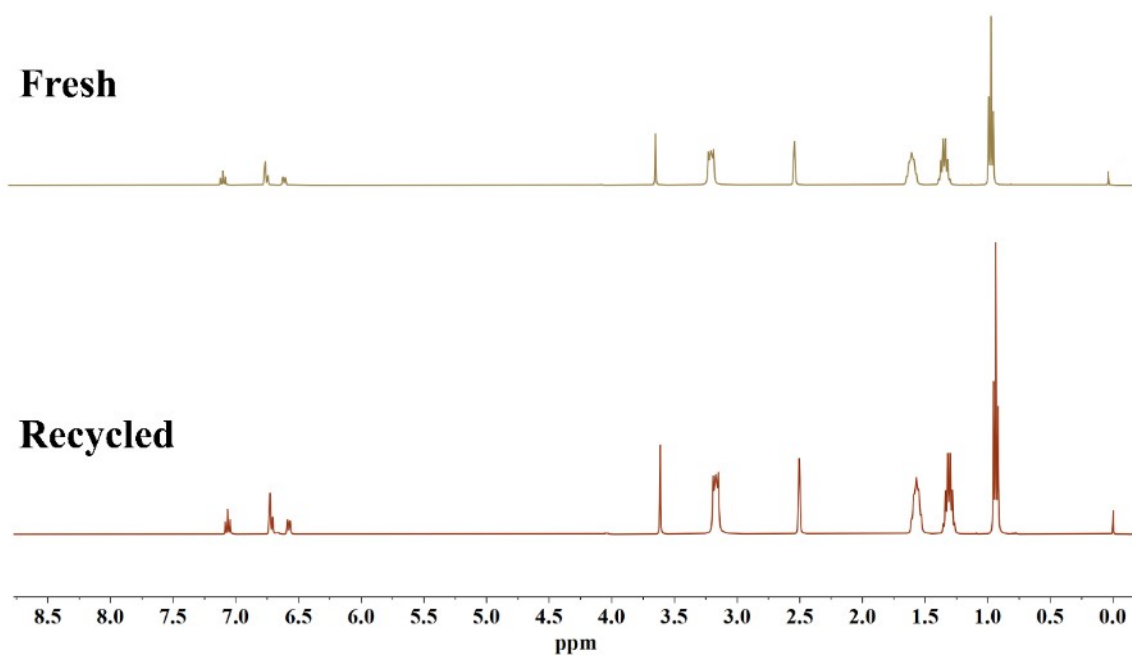

Fig. S1. <sup>1</sup>H NMR spectrum of fresh and recycled binary organocatalyst (400 MHz, DMSO, 298 K).

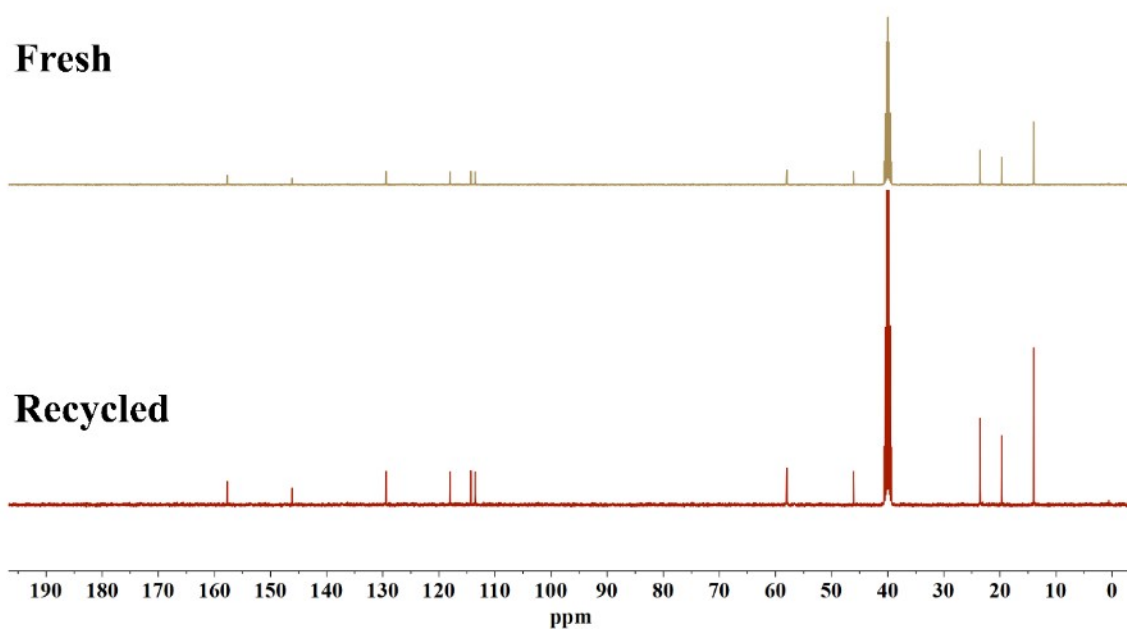

Fig. S2. <sup>13</sup>C NMR spectrum of fresh and recycled binary organocatalyst (126 MHz, DMSO, 298 K).

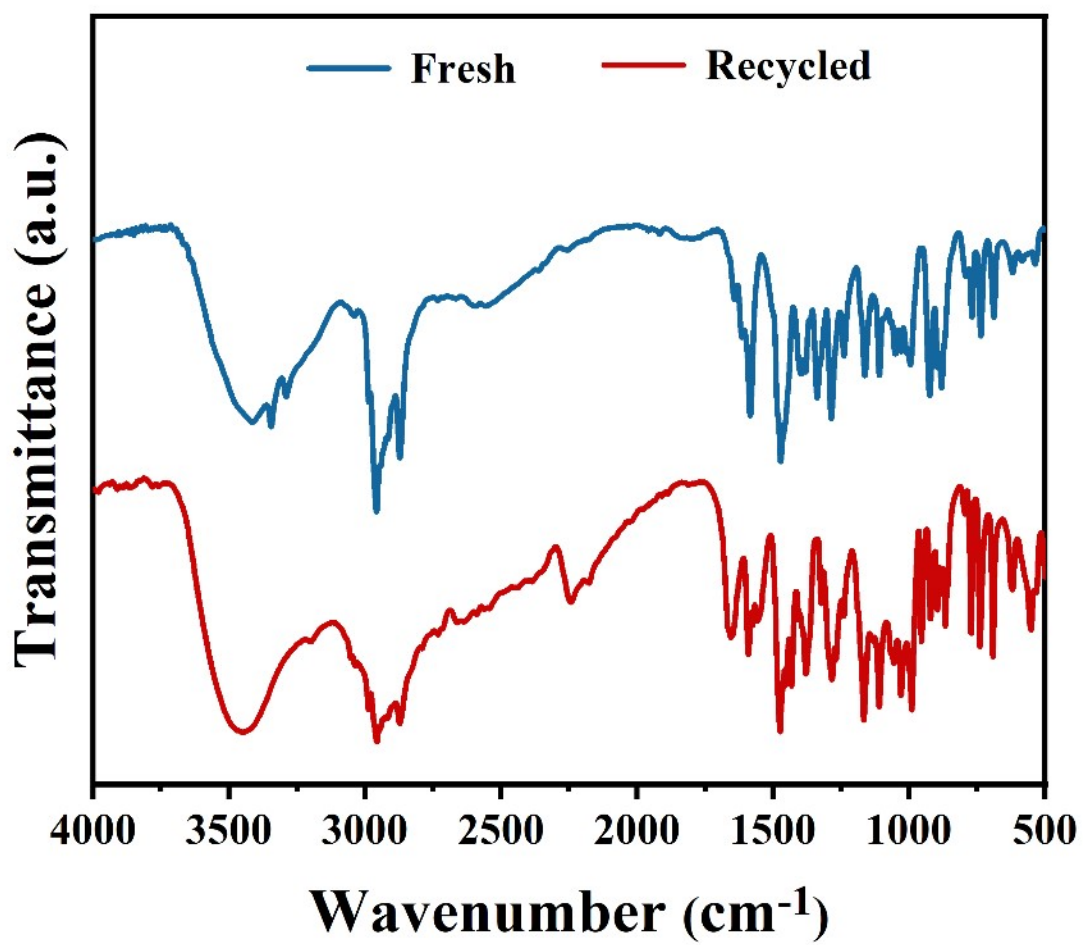

Fig. S3. FT-IR spectra of fresh and recycled binary organocatalyst.

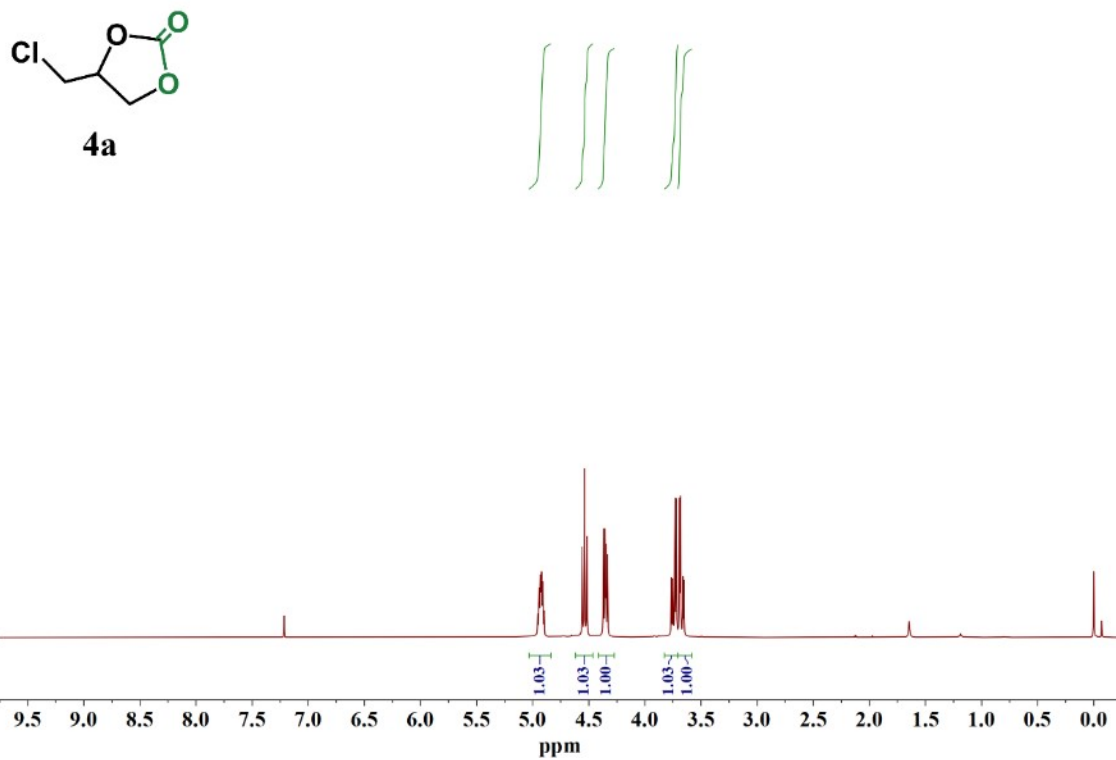

Fig. S4.  $^1\text{H}$  NMR spectrum of **4a** (400 MHz,  $\text{CDCl}_3$ , 298 K).

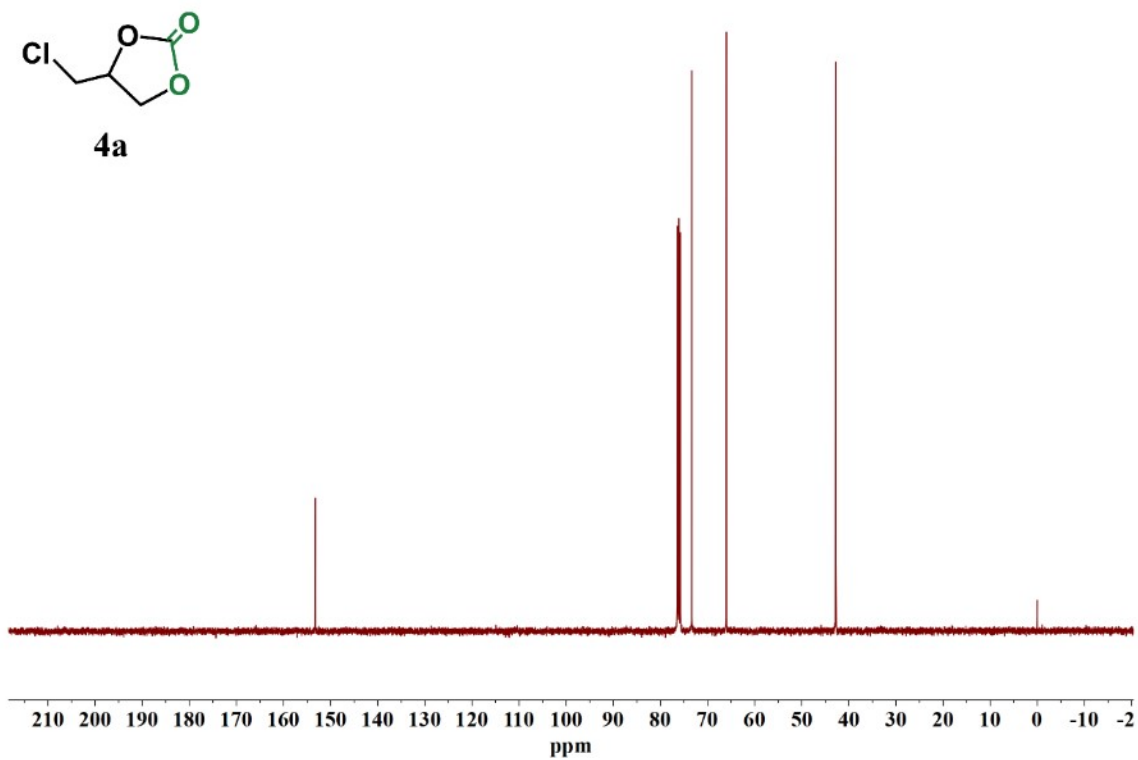

Fig. S5.  $^{13}\text{C}$  NMR spectrum of **4a** (126 MHz,  $\text{CDCl}_3$ , 298 K).



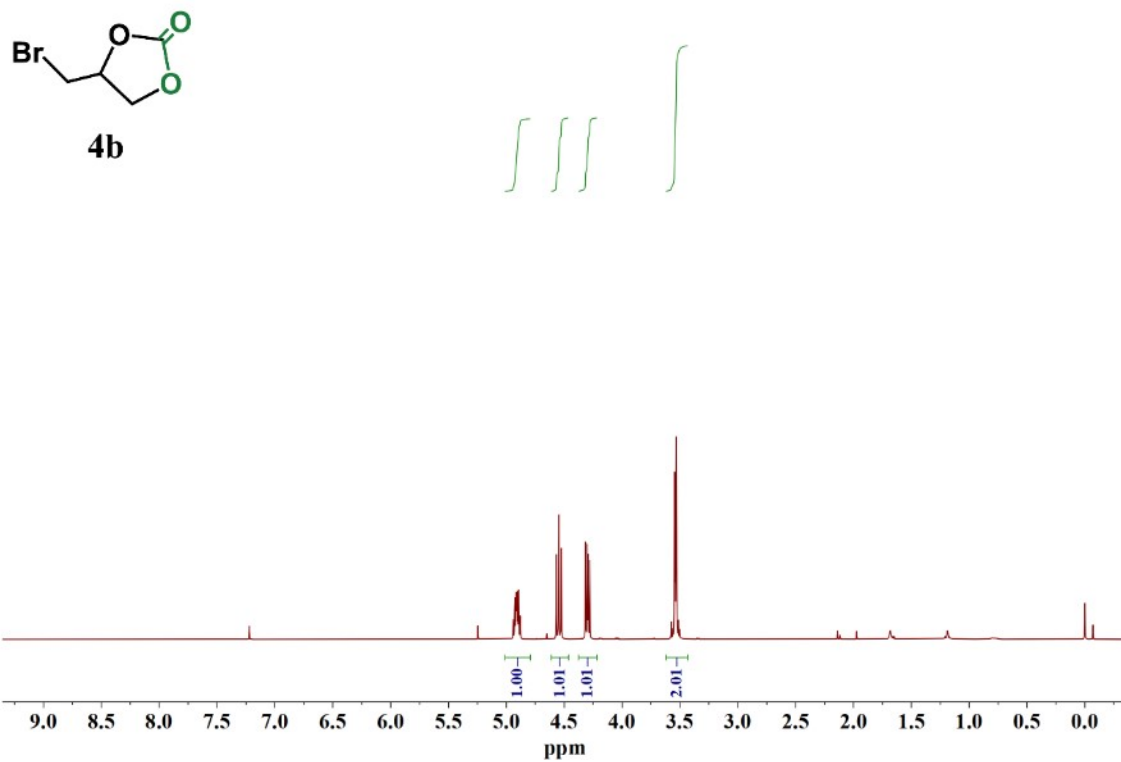

Fig. S6.  $^1\text{H}$  NMR spectrum of **4b** (400 MHz,  $\text{CDCl}_3$ , 298 K).

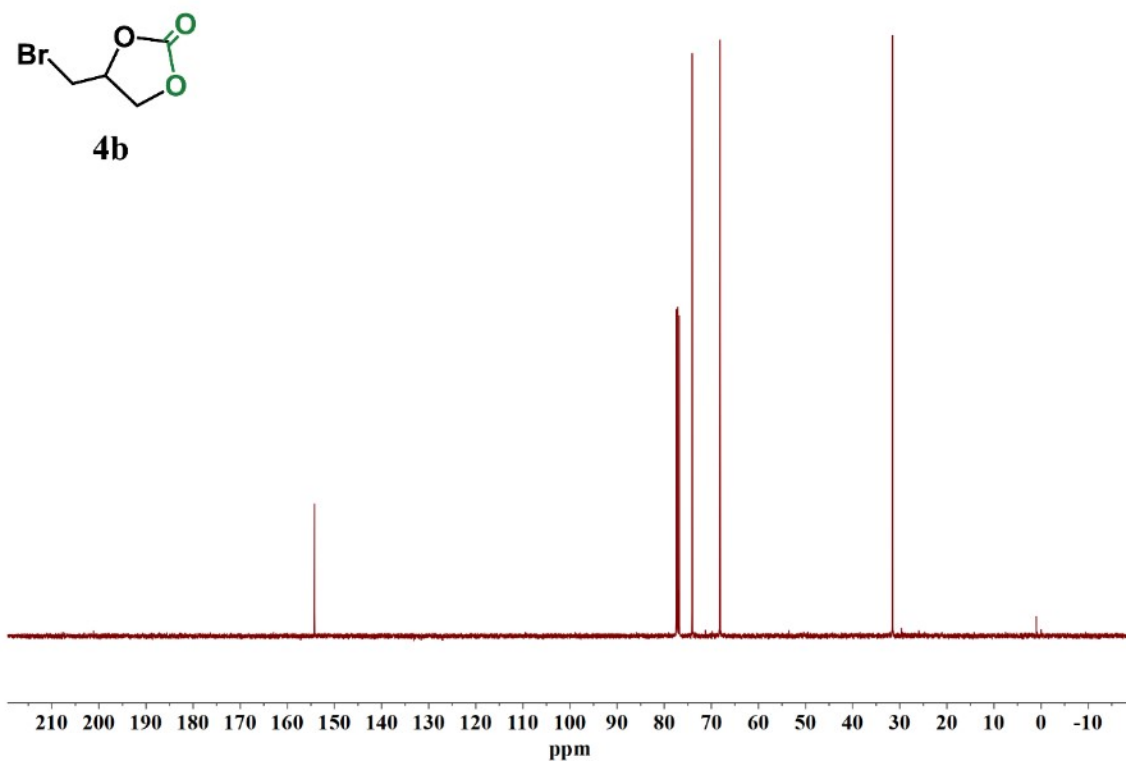

Fig. S7.  $^{13}\text{C}$  NMR spectrum of **4b** (126 MHz,  $\text{CDCl}_3$ , 298 K).

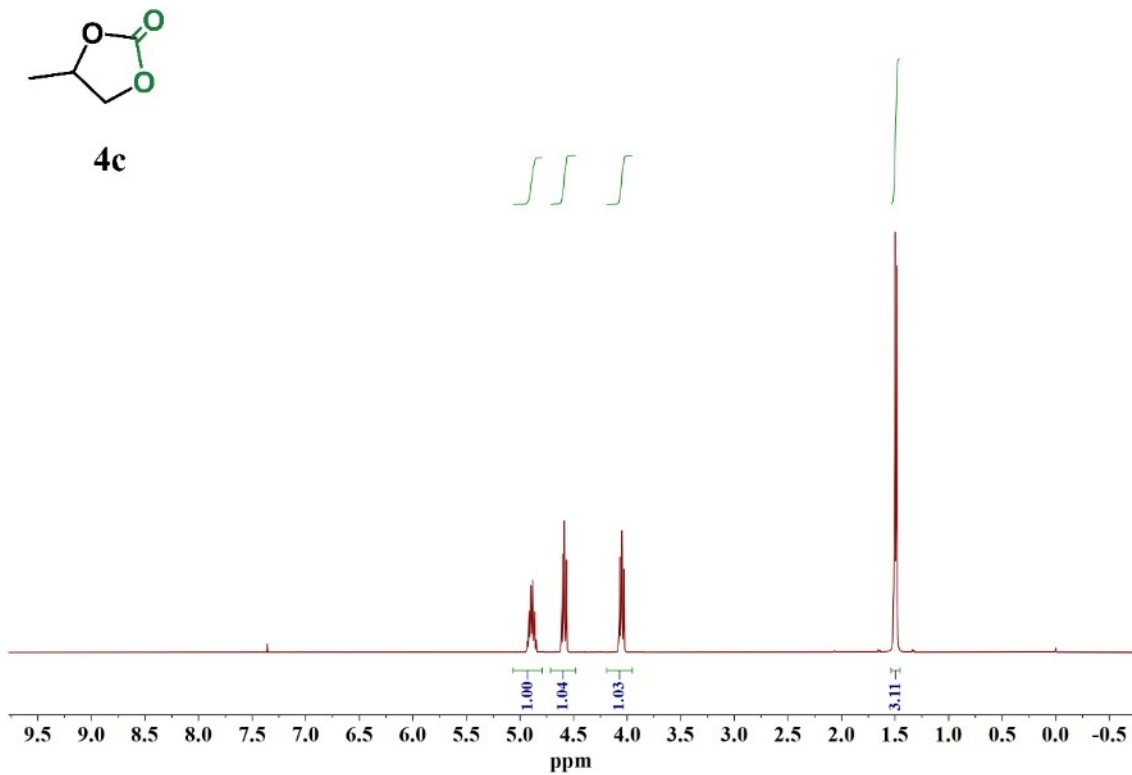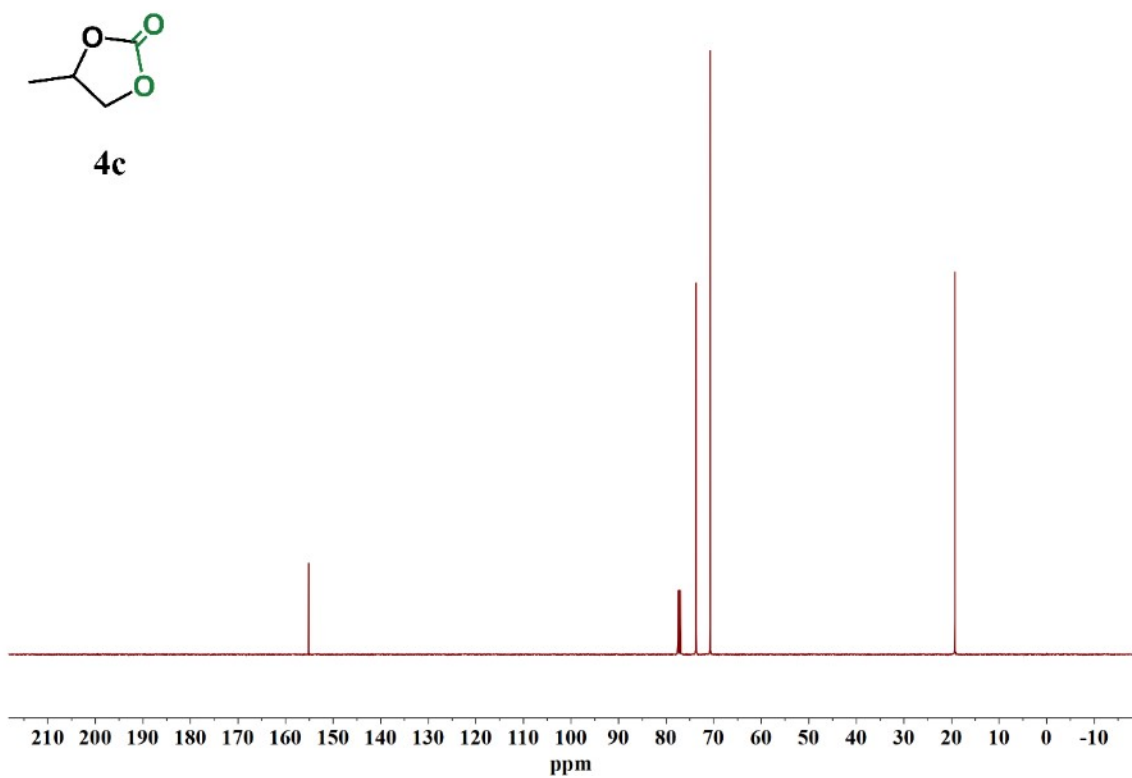

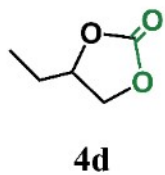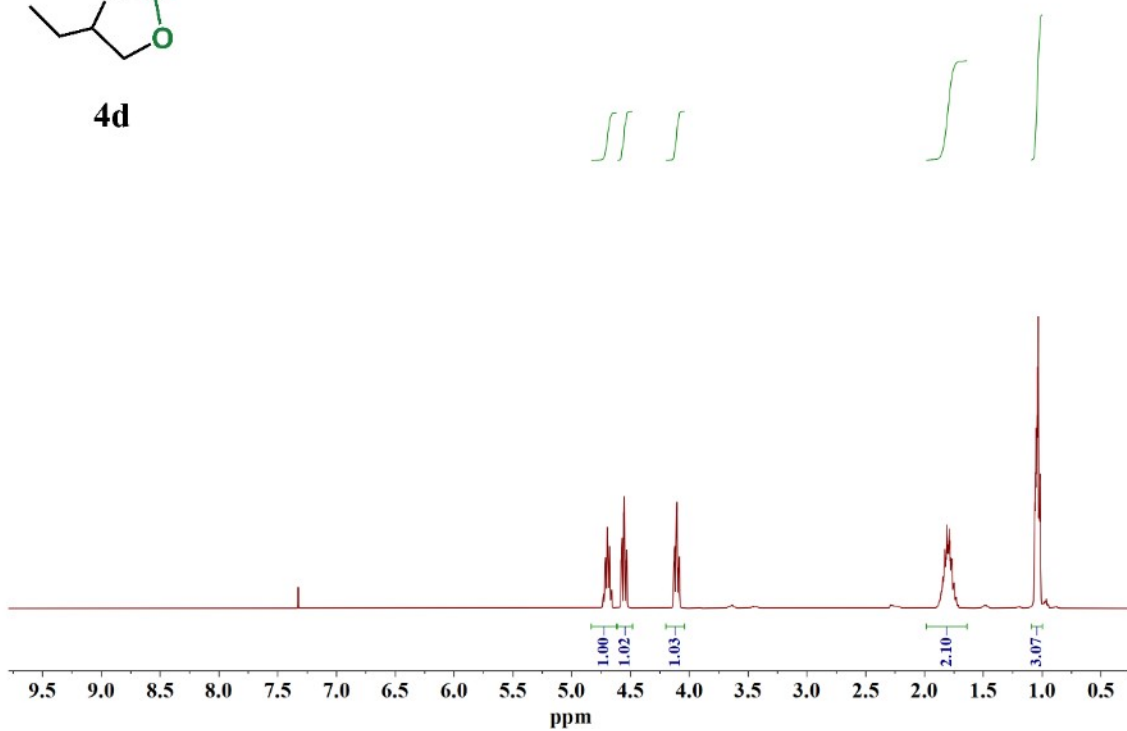

Fig. S10. <sup>1</sup>H NMR spectrum of **4d** (400 MHz, CDCl<sub>3</sub>, 298 K).

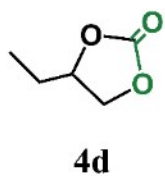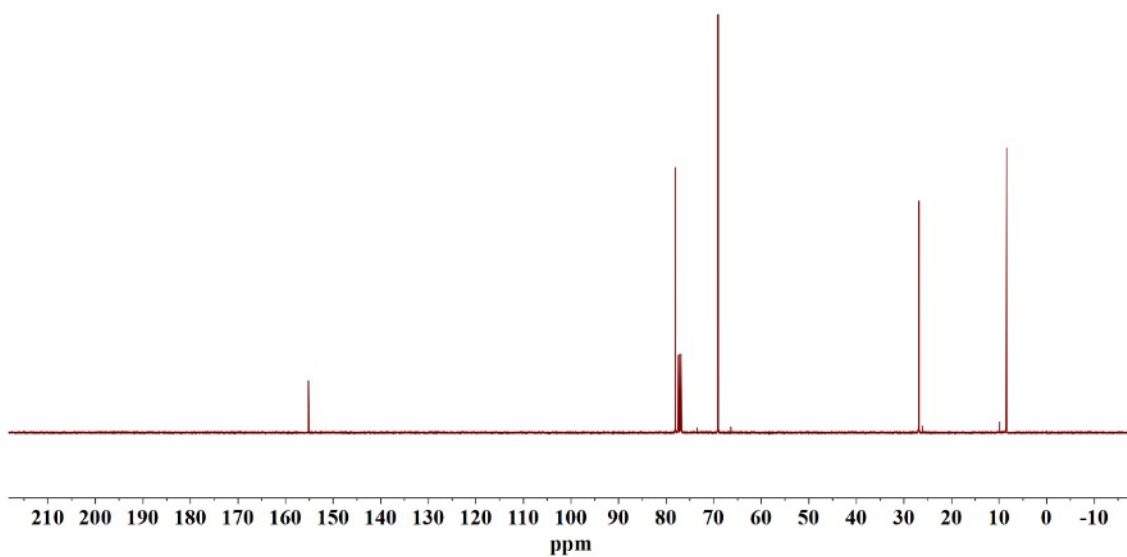

Fig. S11. <sup>13</sup>C NMR spectrum of **4d** (126 MHz, CDCl<sub>3</sub>, 298 K).

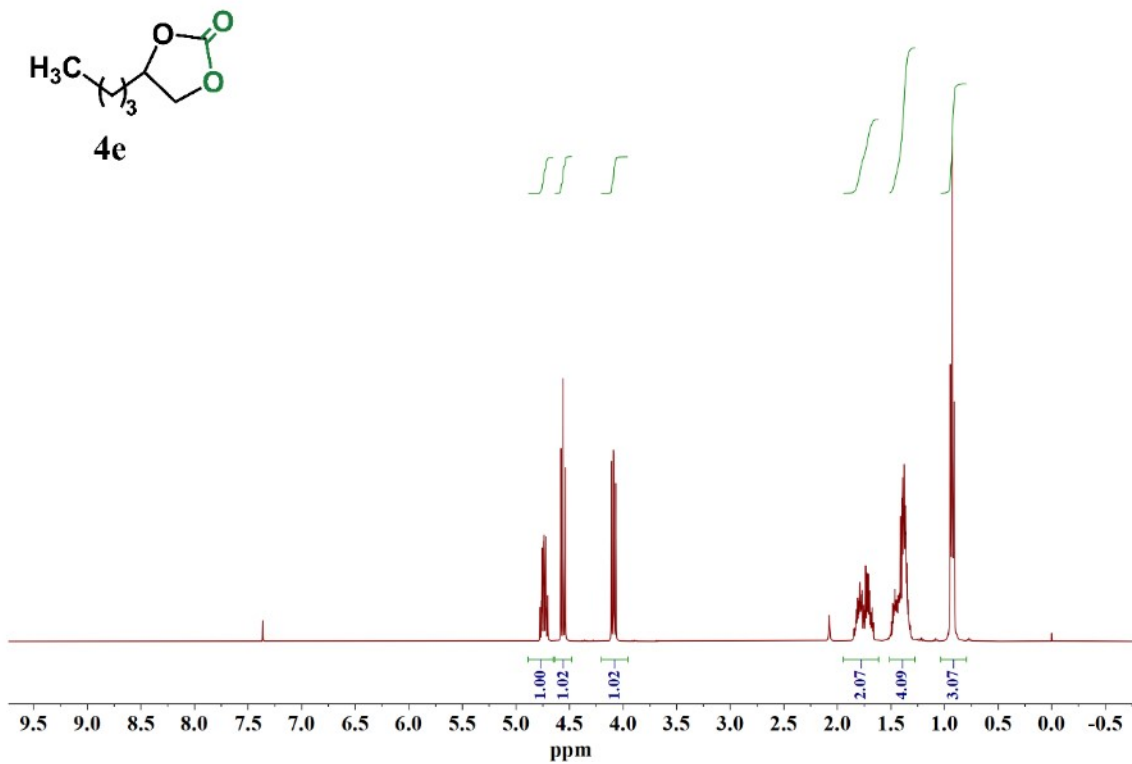

Fig. S12. <sup>1</sup>H NMR spectrum of 4e (400 MHz, CDCl<sub>3</sub>, 298 K).

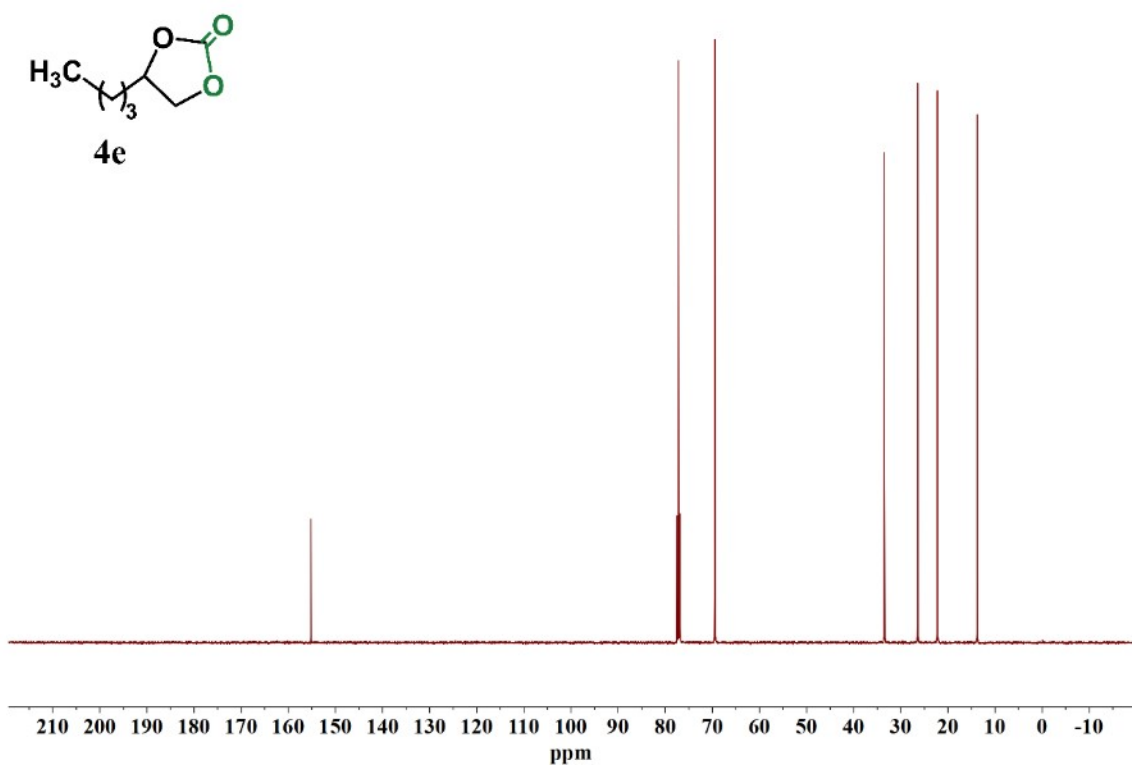

Fig. S13. <sup>13</sup>C NMR spectrum of 4e (126 MHz, CDCl<sub>3</sub>, 298 K).

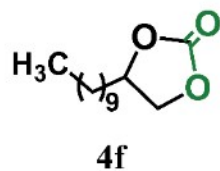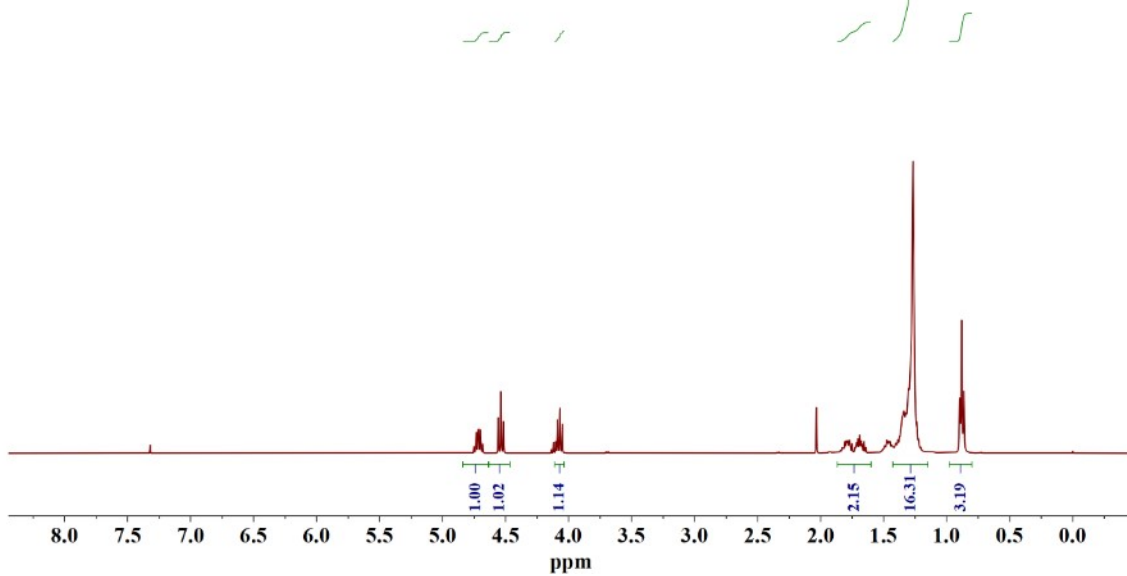

Fig. S14. <sup>1</sup>H NMR spectrum of 4f (400 MHz, CDCl<sub>3</sub>, 298 K).

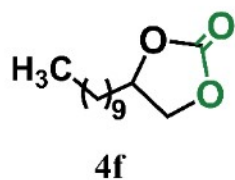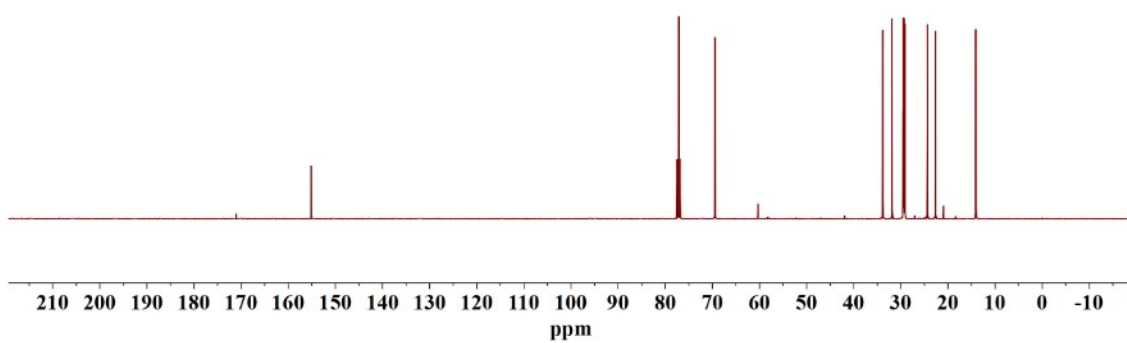

Fig. S15. <sup>13</sup>C NMR spectrum of 4f (126 MHz, CDCl<sub>3</sub>, 298 K).

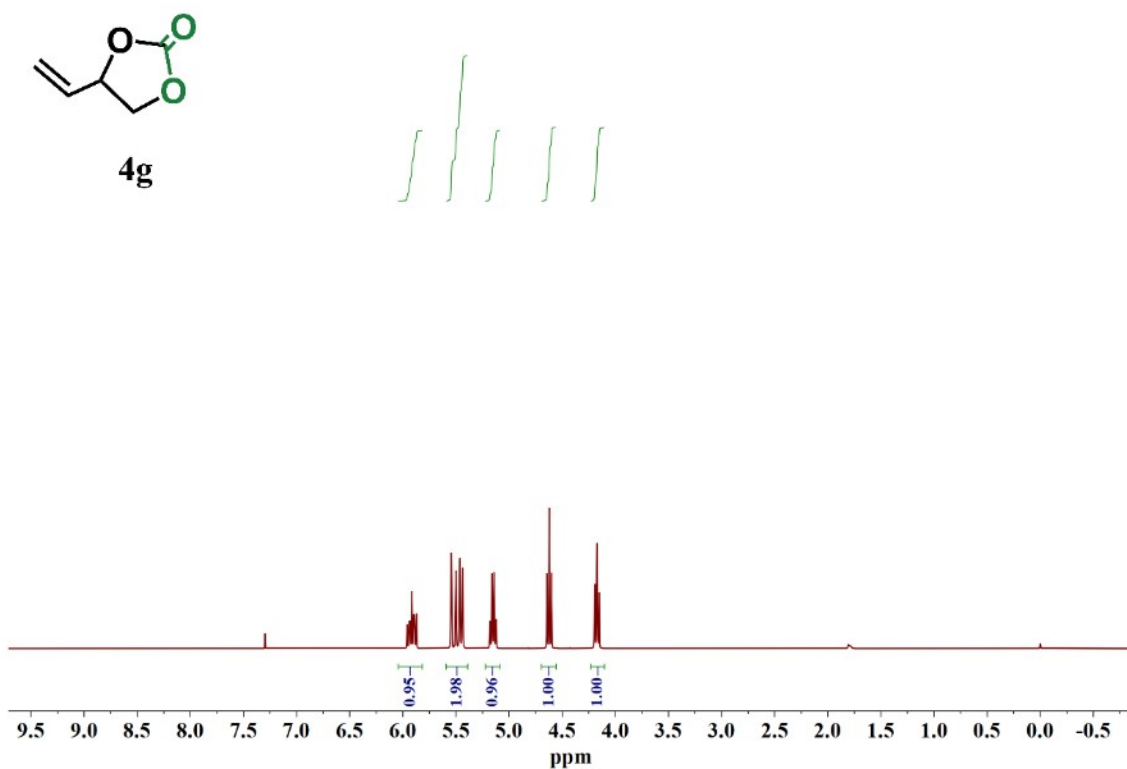

Fig. S16. <sup>1</sup>H NMR spectrum of **4g** (400 MHz, CDCl<sub>3</sub>, 298 K).

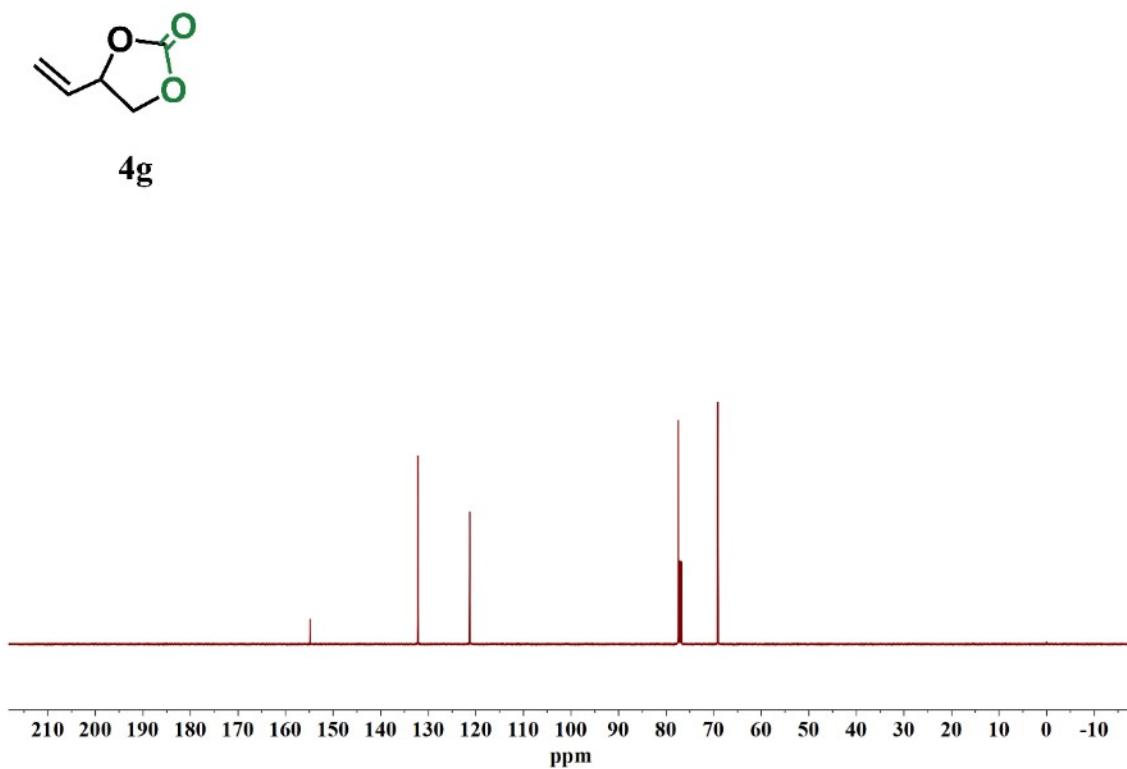

Fig. S17. <sup>13</sup>C NMR spectrum of **4g** (126 MHz, CDCl<sub>3</sub>, 298 K).

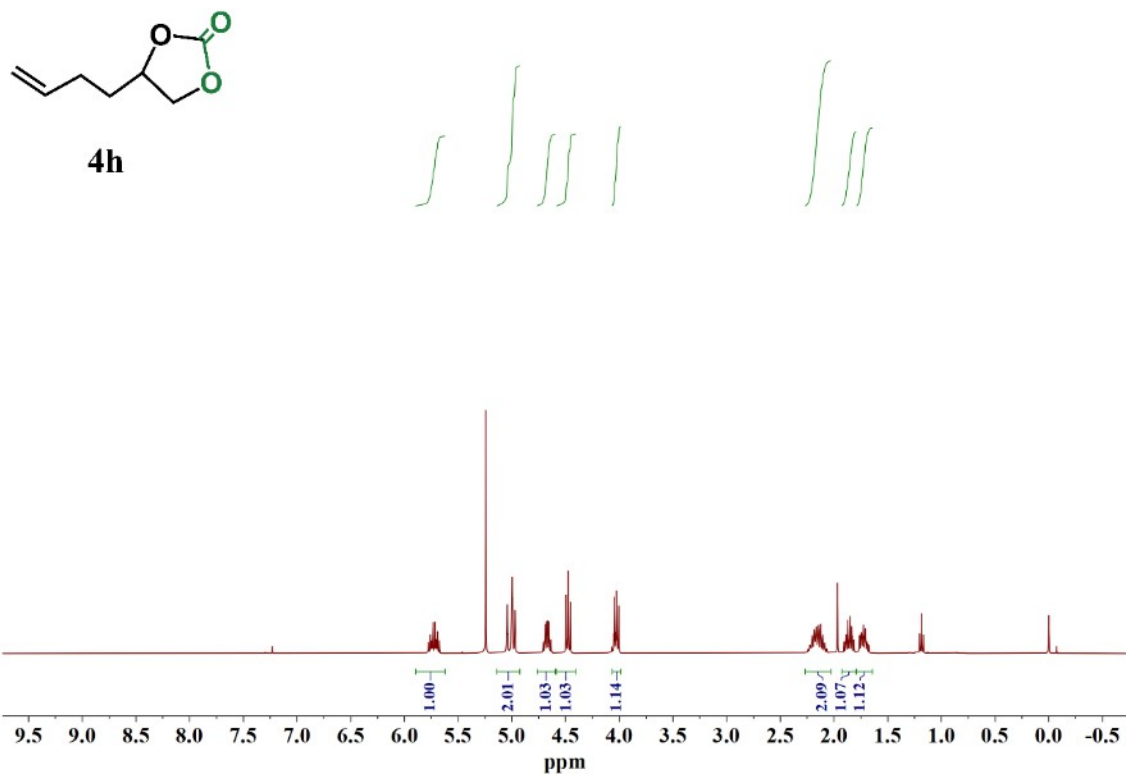

Fig. S18. <sup>1</sup>H NMR spectrum of **4h** (400 MHz, CDCl<sub>3</sub>, 298 K).

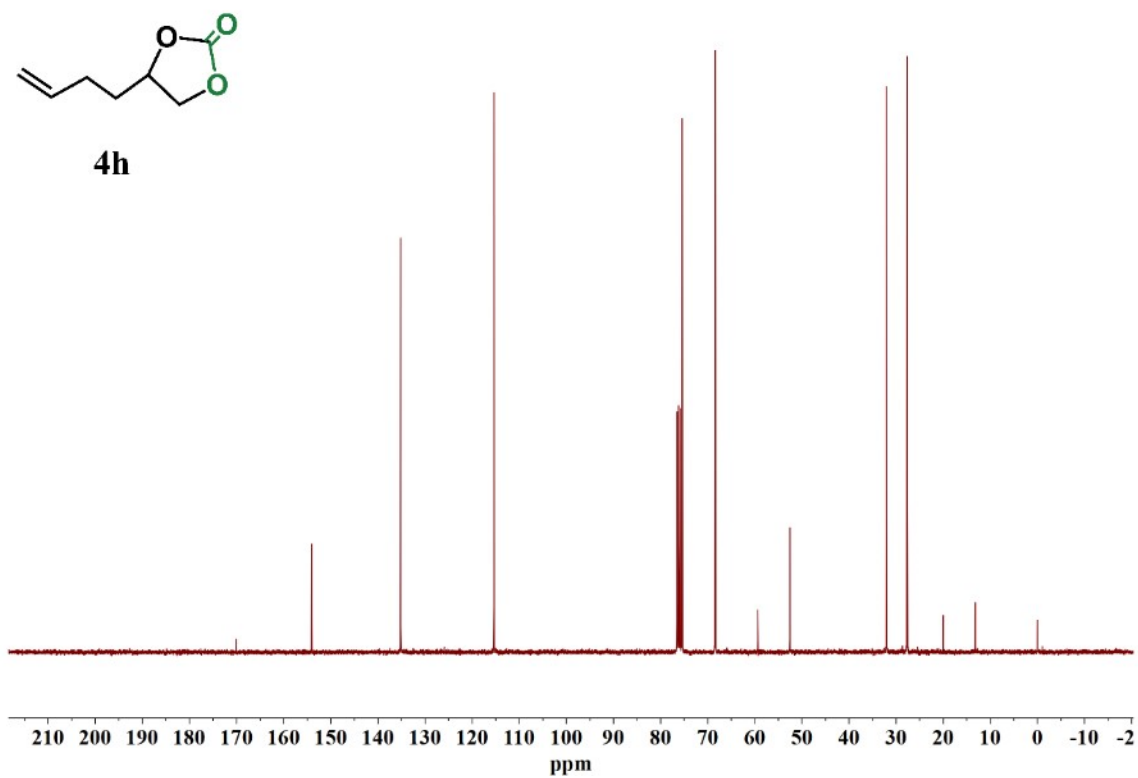

Fig. S19. <sup>13</sup>C NMR spectrum of **4h** (126 MHz, CDCl<sub>3</sub>, 298 K).

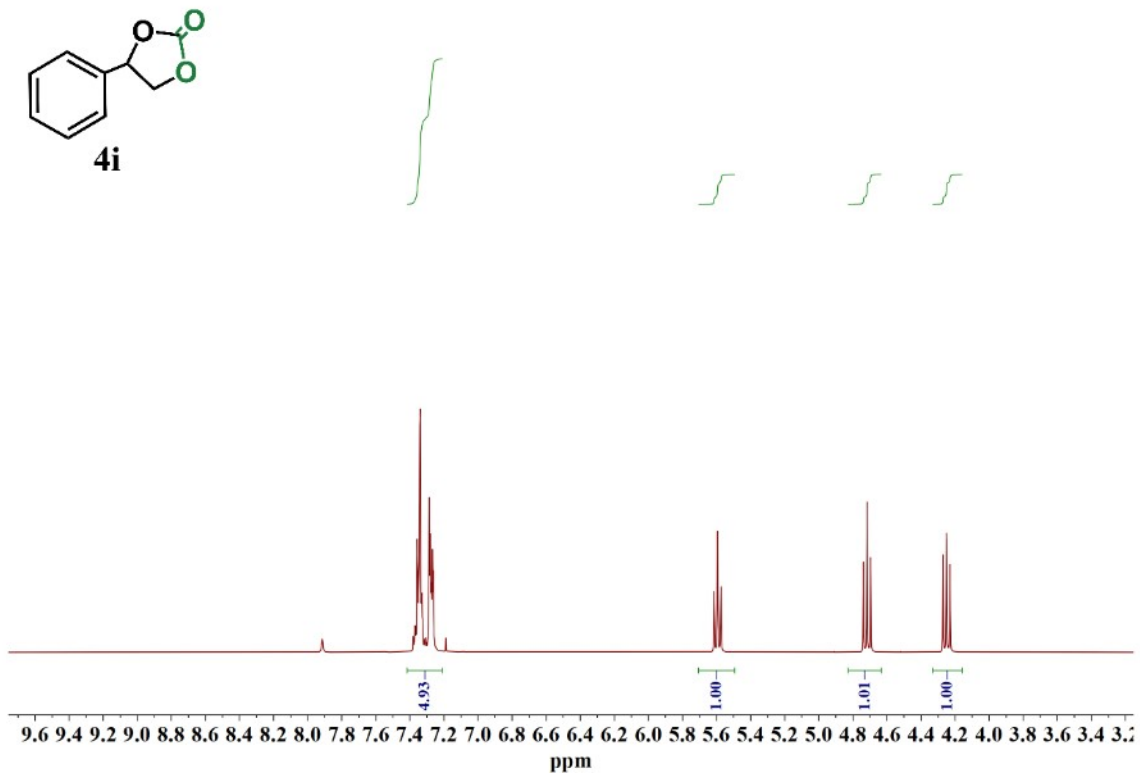

Fig. S20. <sup>1</sup>H NMR spectrum of **4i** (400 MHz, CDCl<sub>3</sub>, 298 K).

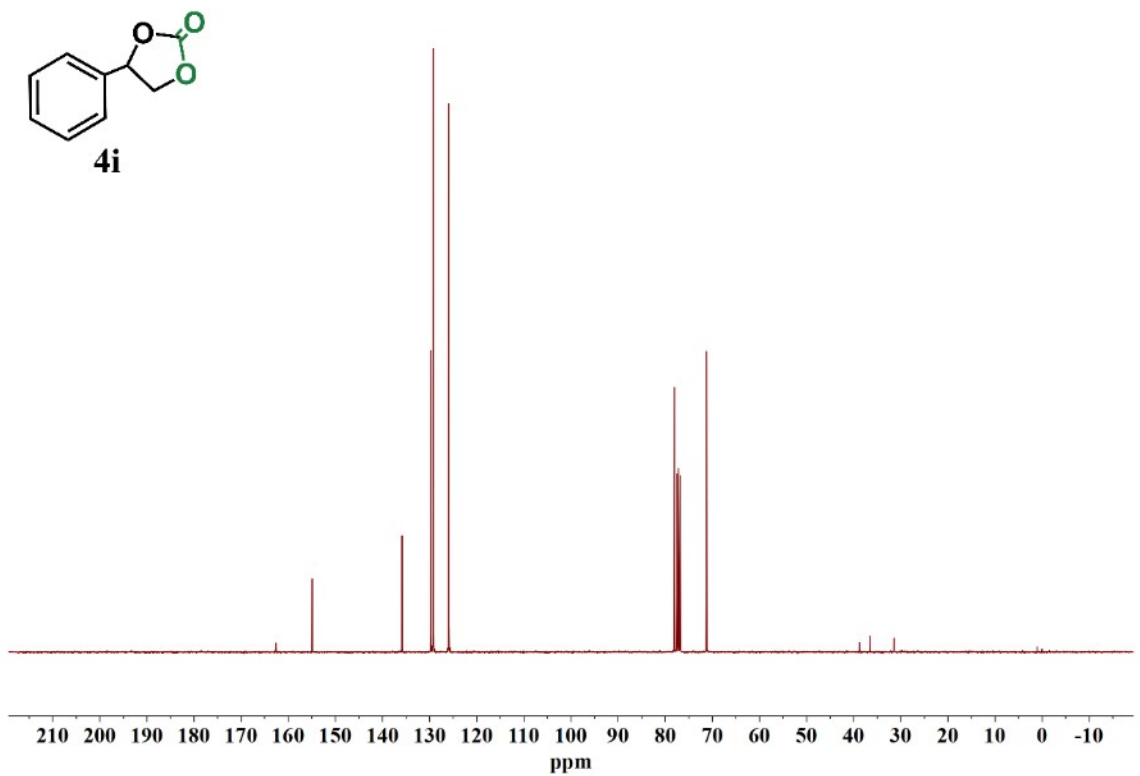

Fig. S21. <sup>13</sup>C NMR spectrum of **4i** (126 MHz, CDCl<sub>3</sub>, 298 K).



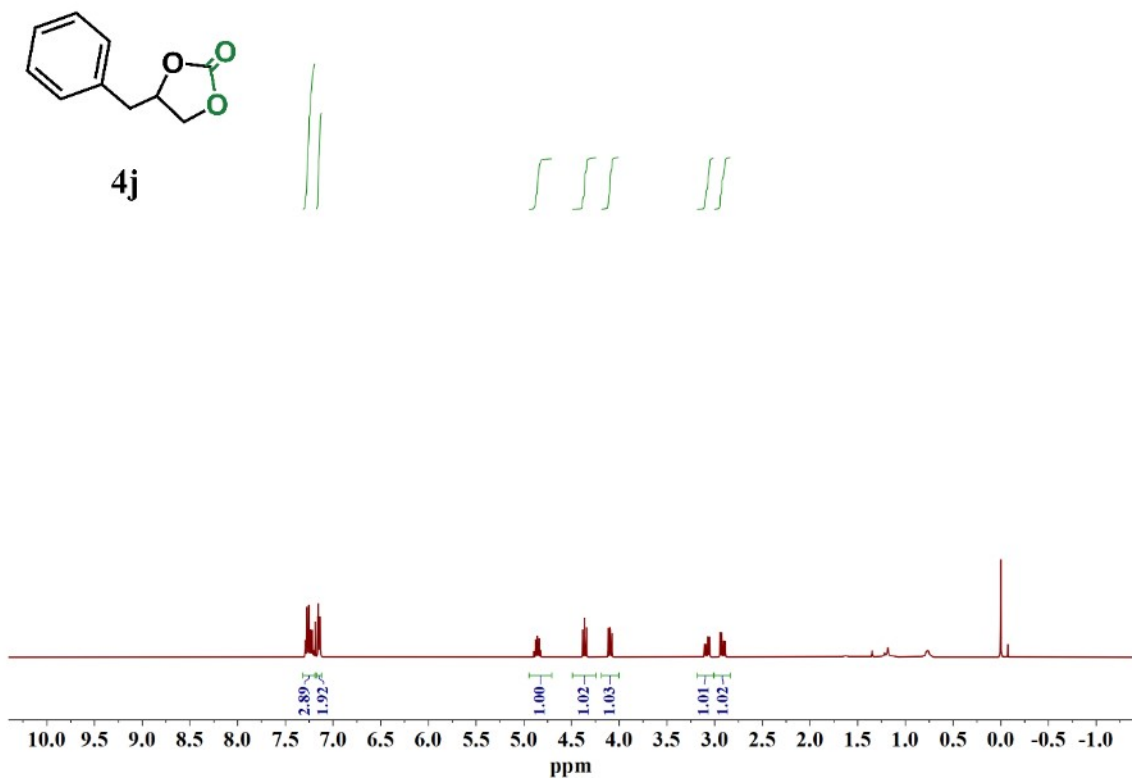

Fig. S22.  $^1\text{H}$  NMR spectrum of **4j** (400 MHz,  $\text{CDCl}_3$ , 298 K).

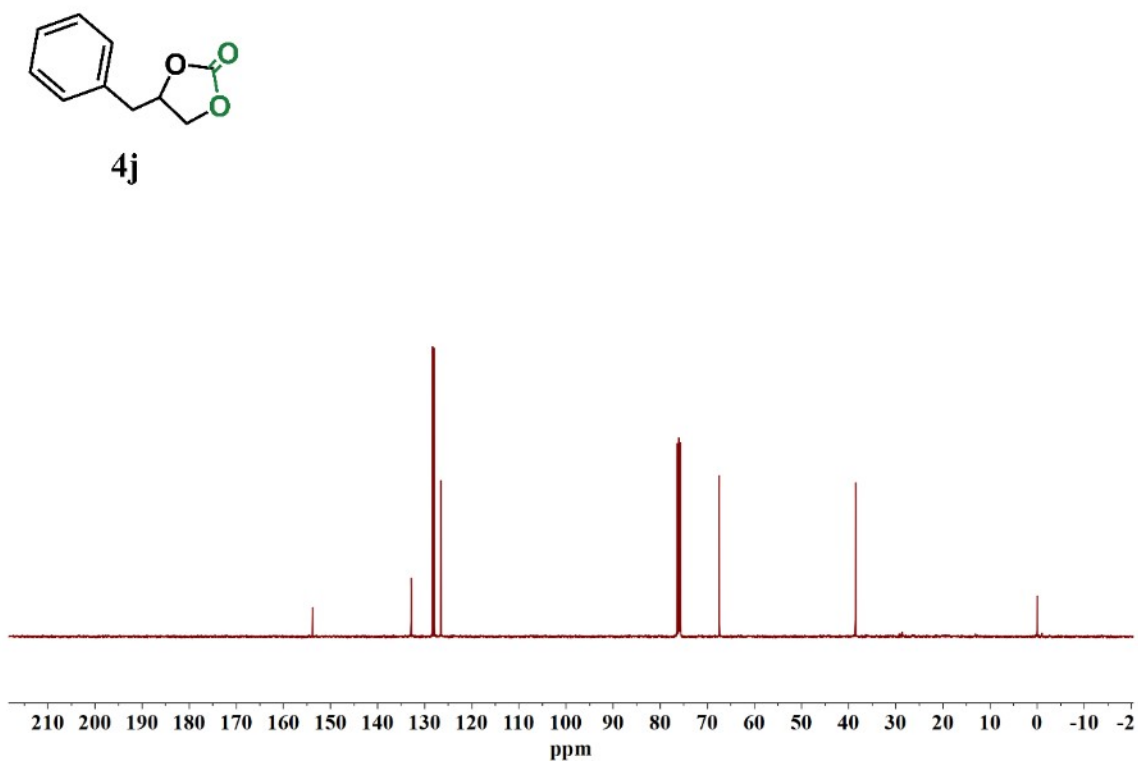

Fig. S23.  $^{13}\text{C}$  NMR spectrum of **4j** (126 MHz,  $\text{CDCl}_3$ , 298 K).

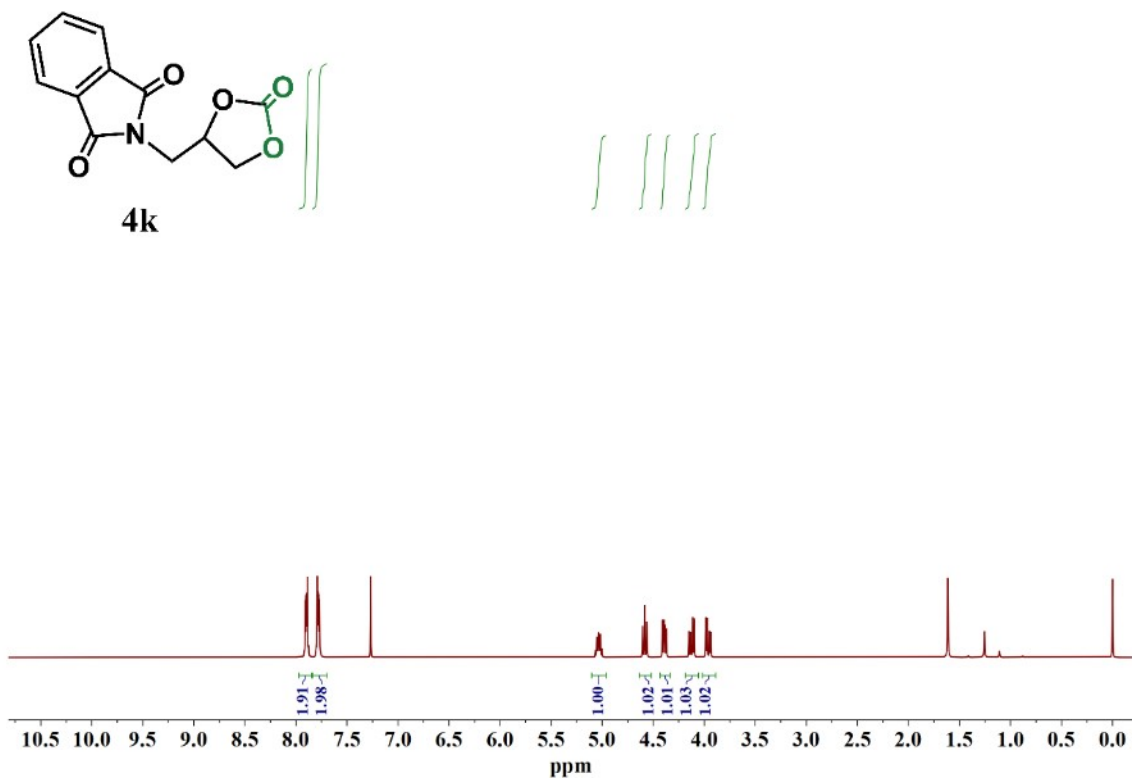

Fig. S24.  $^1\text{H}$  NMR spectrum of **4k** (400 MHz,  $\text{CDCl}_3$ , 298 K).

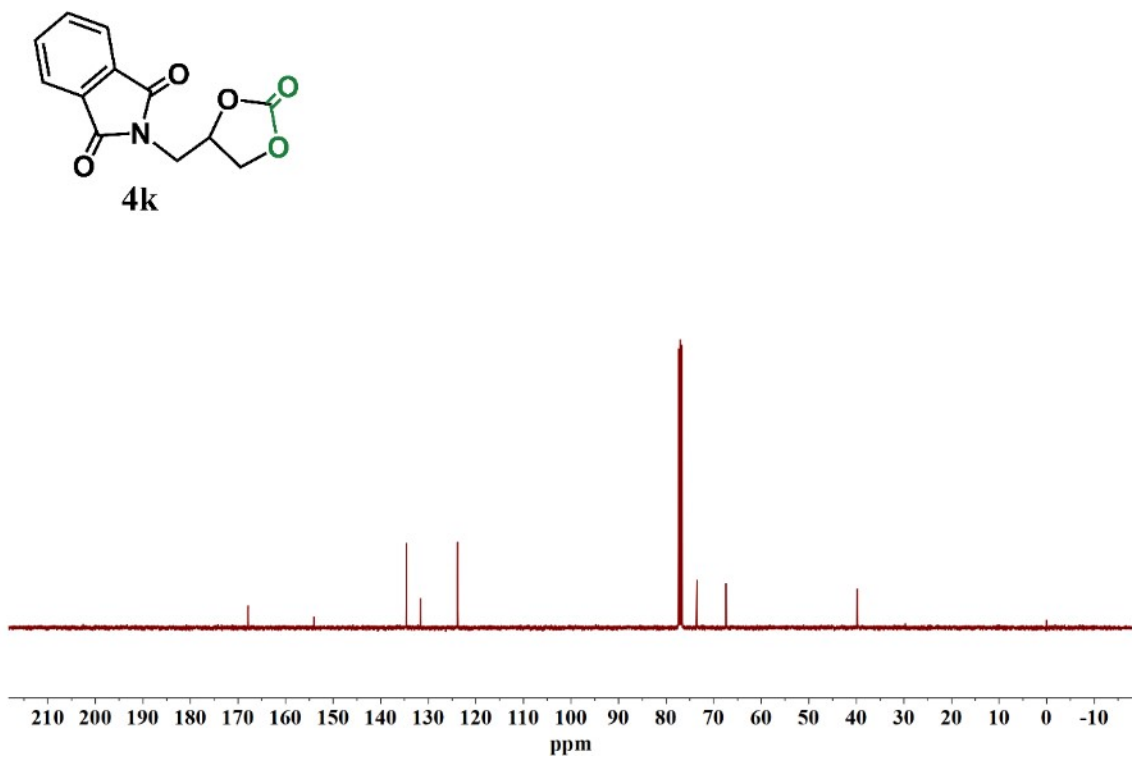

Fig. S25.  $^{13}\text{C}$  NMR spectrum of **4k** (126 MHz,  $\text{CDCl}_3$ , 298 K).

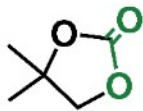

4l

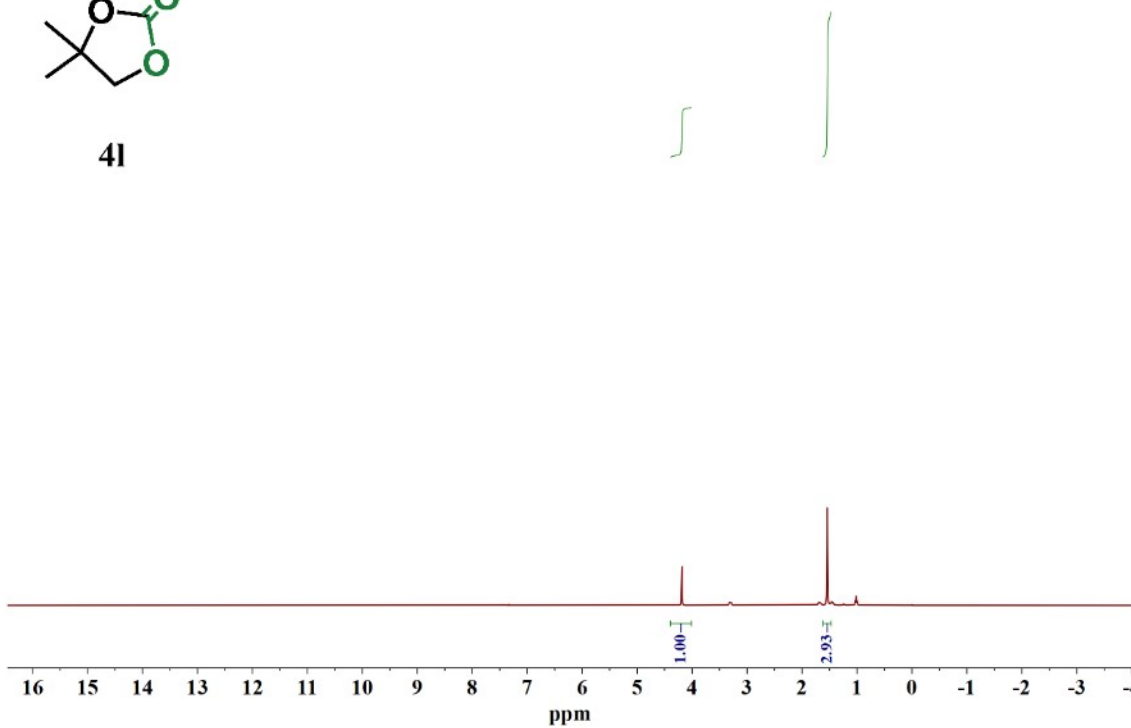

Fig. S26. <sup>1</sup>H NMR spectrum of 4l (400 MHz, CDCl<sub>3</sub>, 298 K).

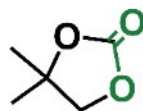

4l

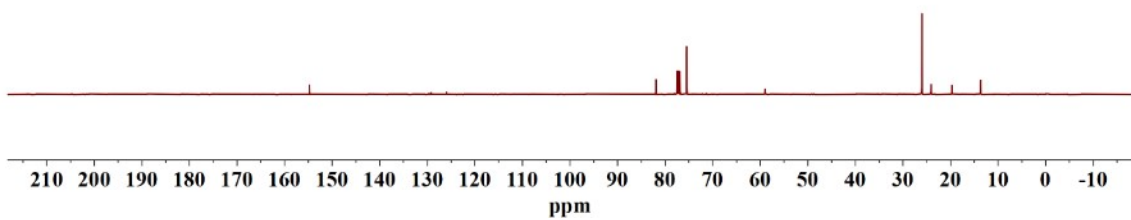

Fig. S27. <sup>13</sup>C NMR spectrum of 4l (126 MHz, CDCl<sub>3</sub>, 298 K).

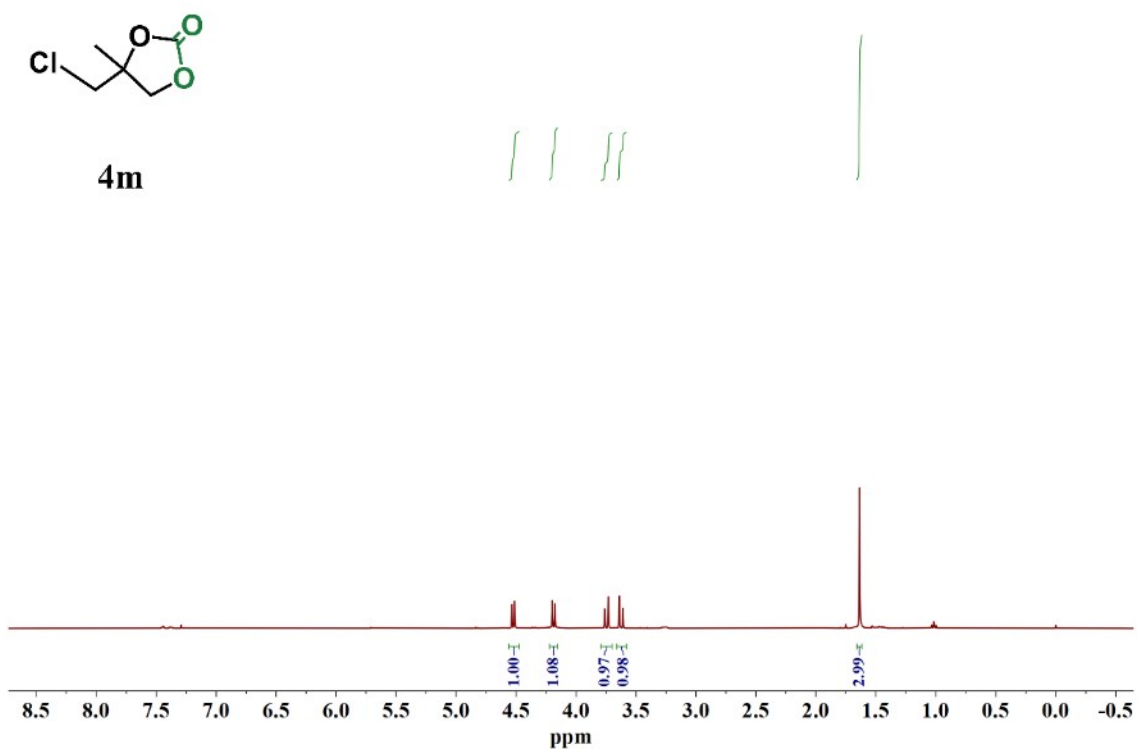

**Fig. S28.**  $^1\text{H}$  NMR spectrum of **4m** (400 MHz,  $\text{CDCl}_3$ , 298 K).

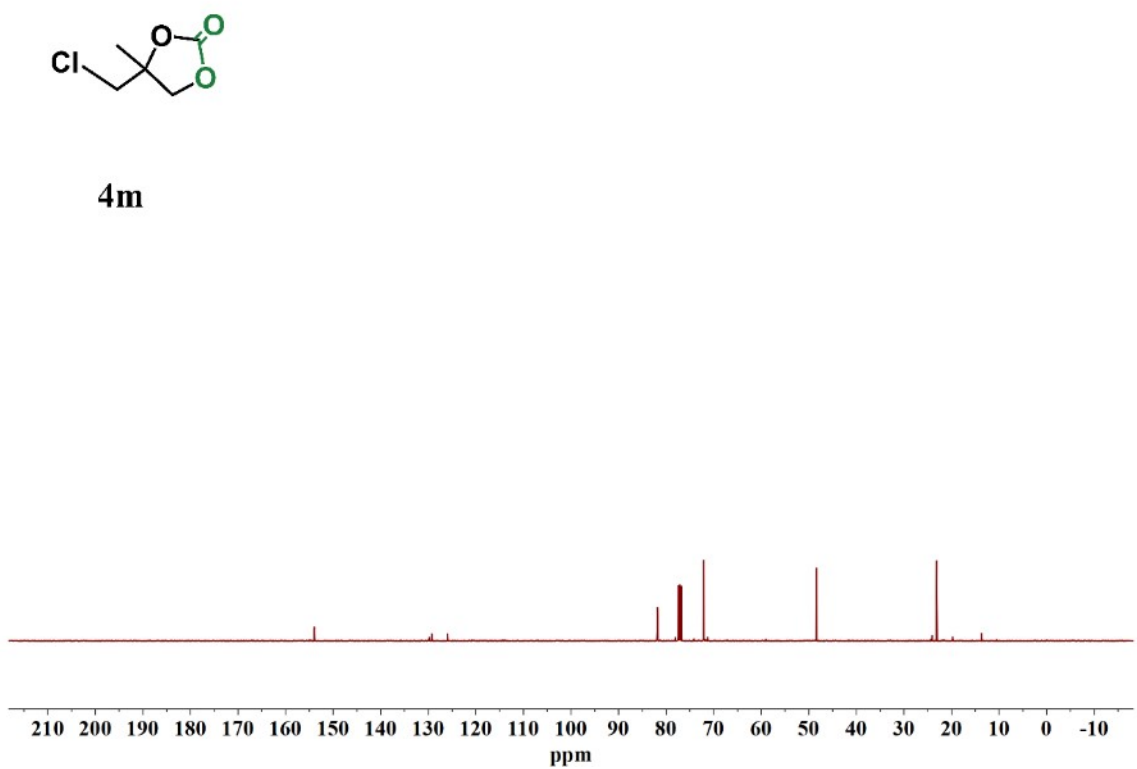

**Fig. S29.**  $^{13}\text{C}$  NMR spectrum of **4m** (126 MHz,  $\text{CDCl}_3$ , 298 K).

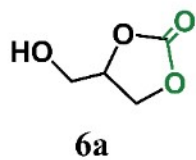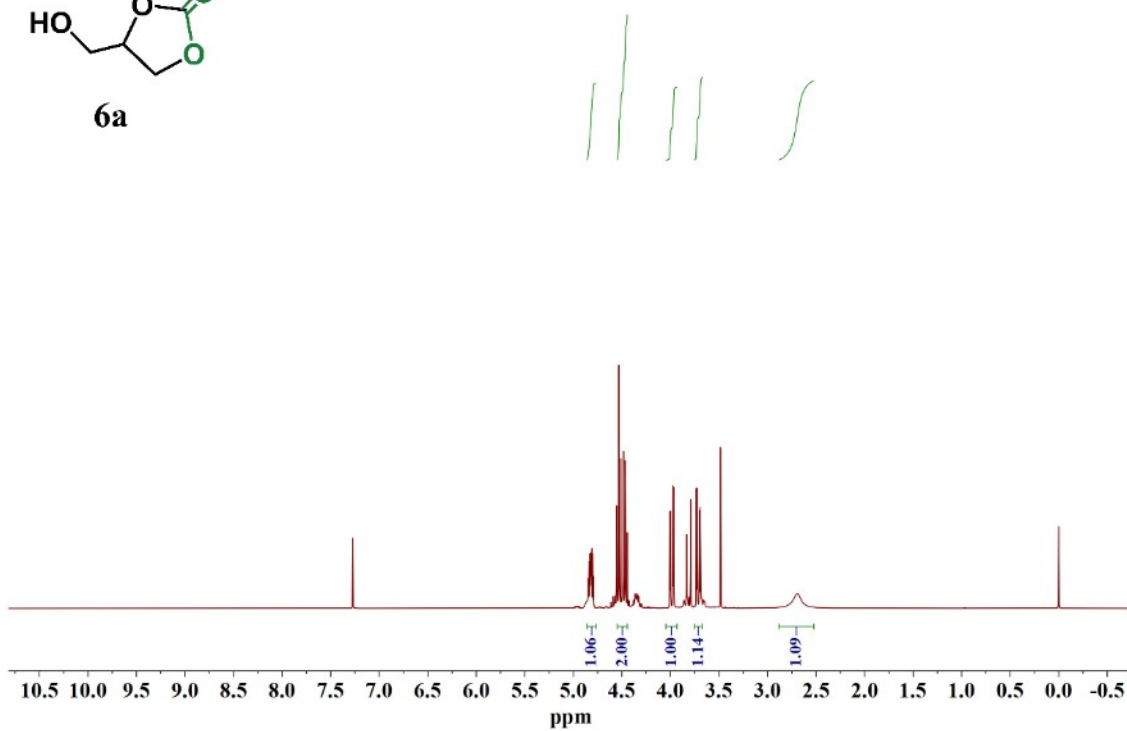

Fig. S30. <sup>1</sup>H NMR spectrum of **6a** (400 MHz, CDCl<sub>3</sub>, 298 K).

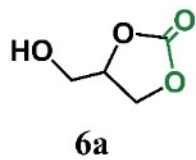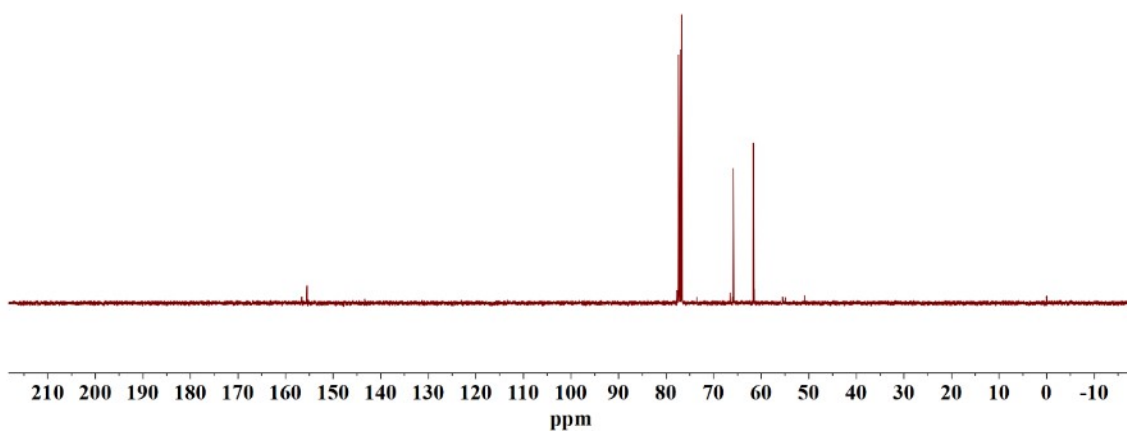

Fig. S31. <sup>13</sup>C NMR spectrum of **6a** (126 MHz, CDCl<sub>3</sub>, 298 K).

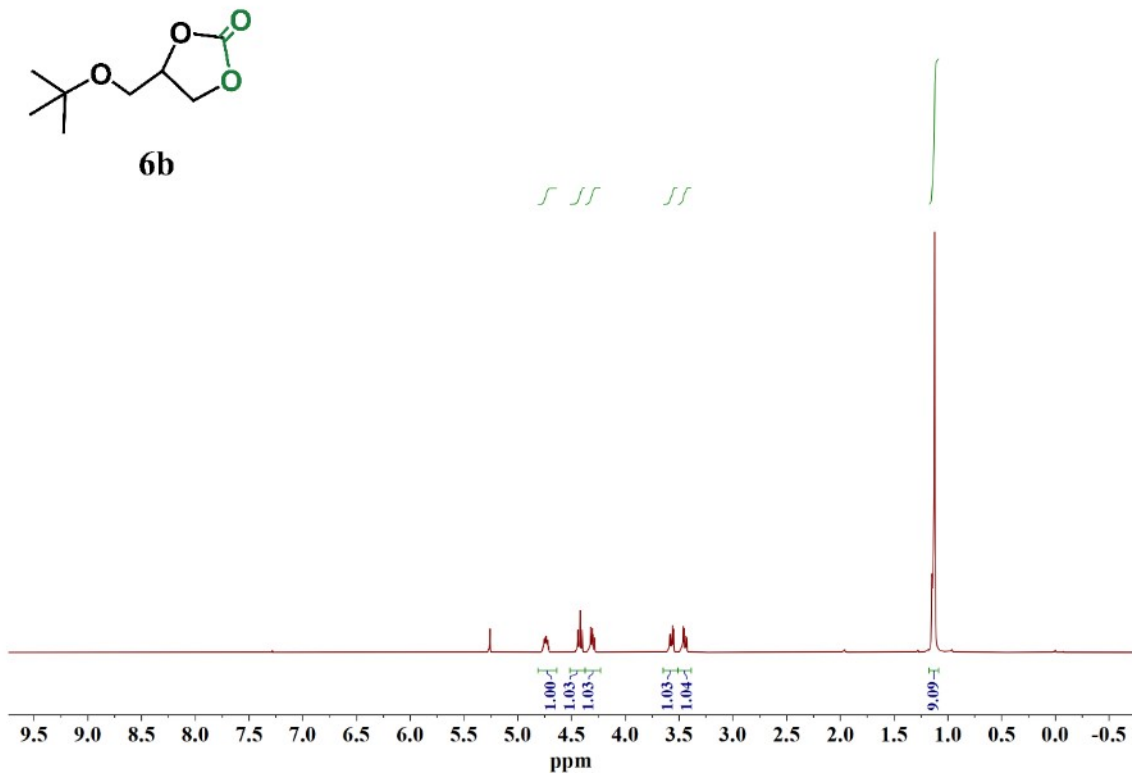

Fig. S32.  $^1\text{H}$  NMR spectrum of **6b** (400 MHz,  $\text{CDCl}_3$ , 298 K).

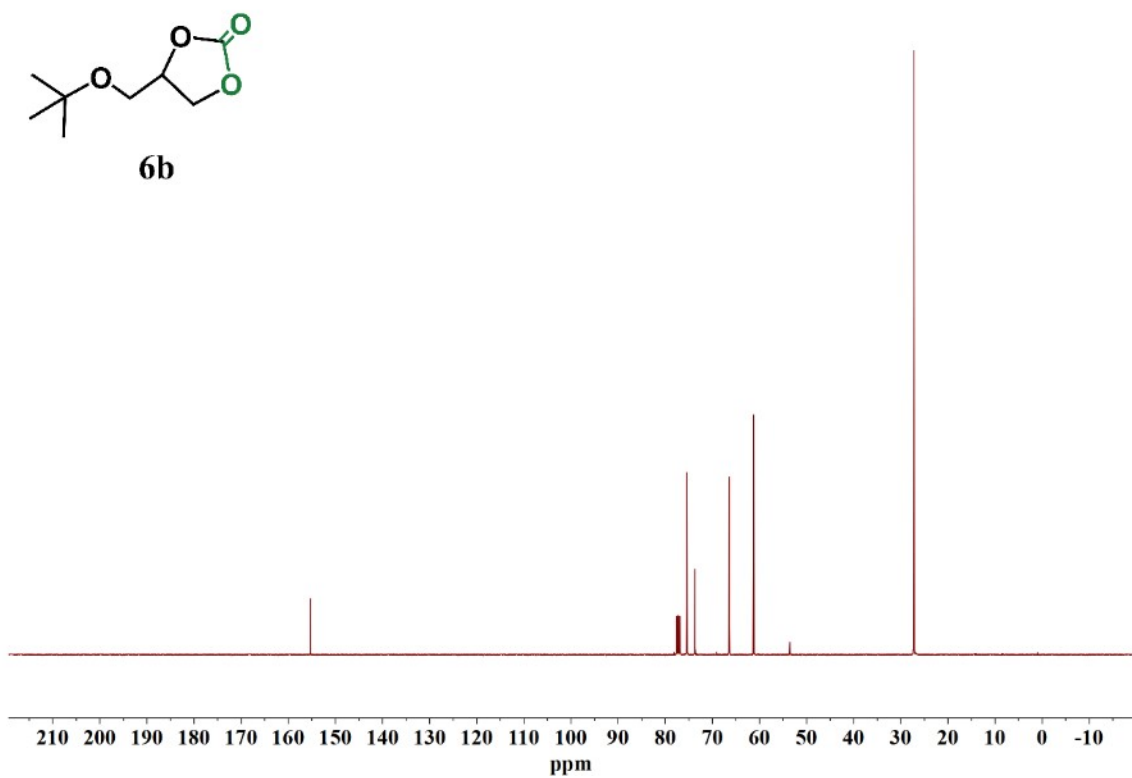

Fig. S33.  $^{13}\text{C}$  NMR spectrum of **6b** (126 MHz,  $\text{CDCl}_3$ , 298 K).

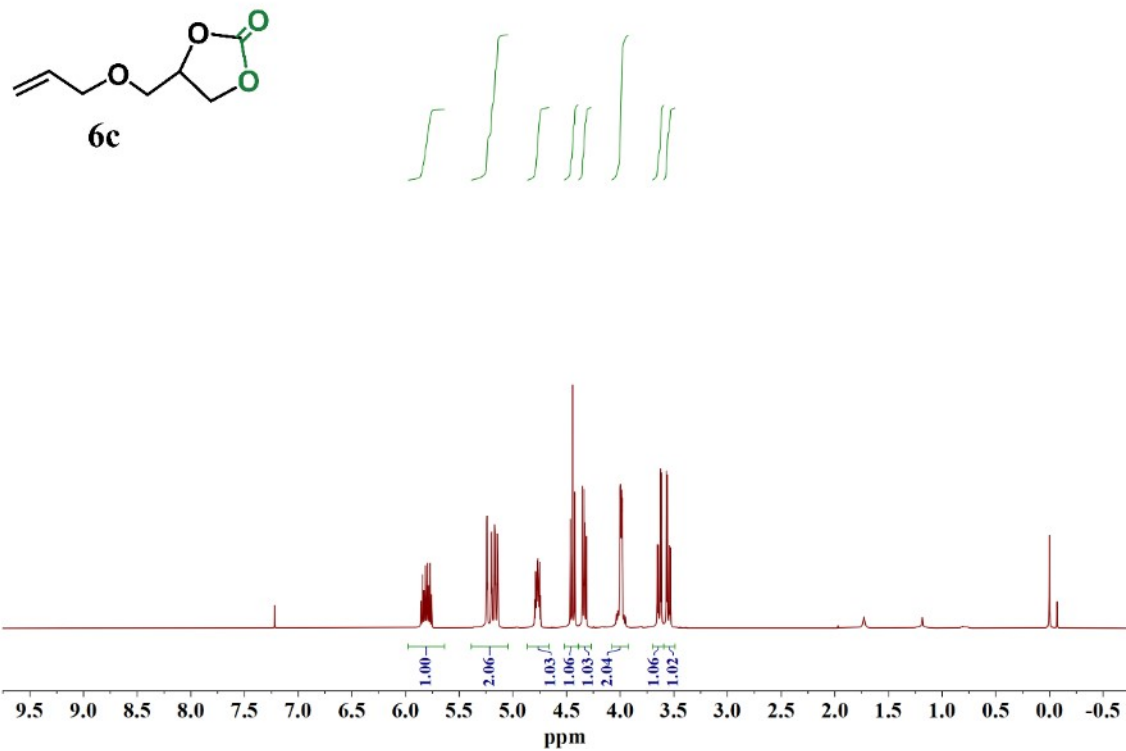

Fig. S34. <sup>1</sup>H NMR spectrum of **6c** (400 MHz, CDCl<sub>3</sub>, 298 K).

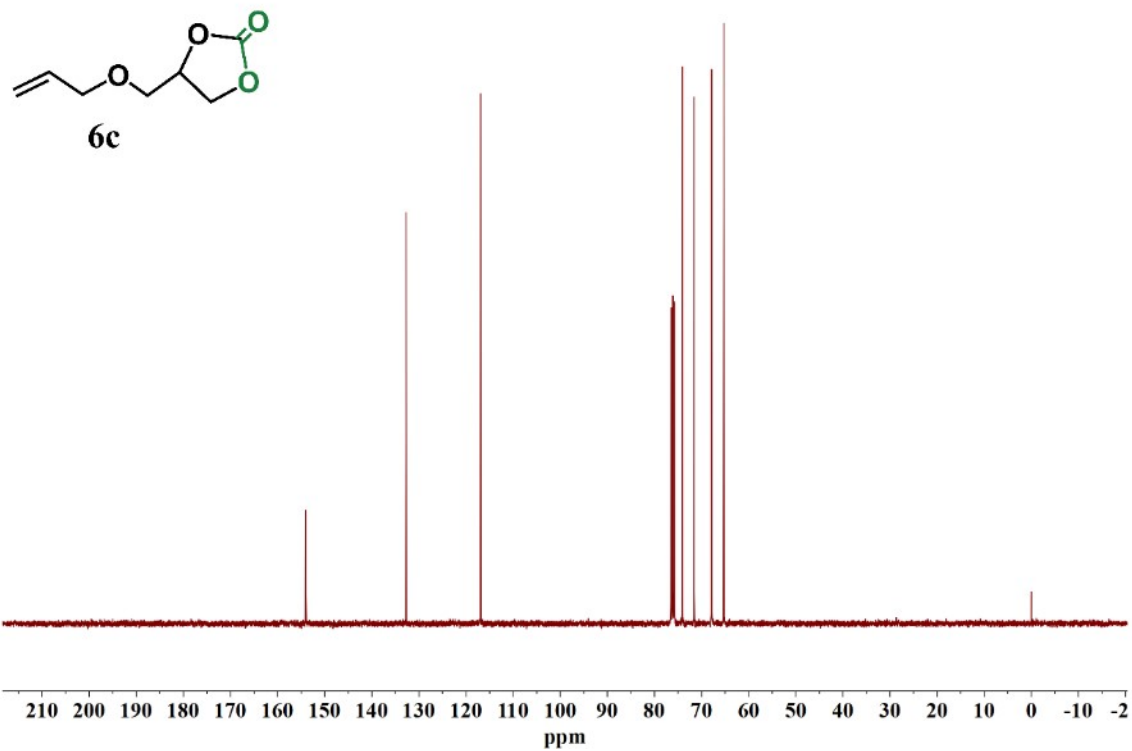

Fig. S35. <sup>13</sup>C NMR spectrum of **6c** (126 MHz, CDCl<sub>3</sub>, 298 K).

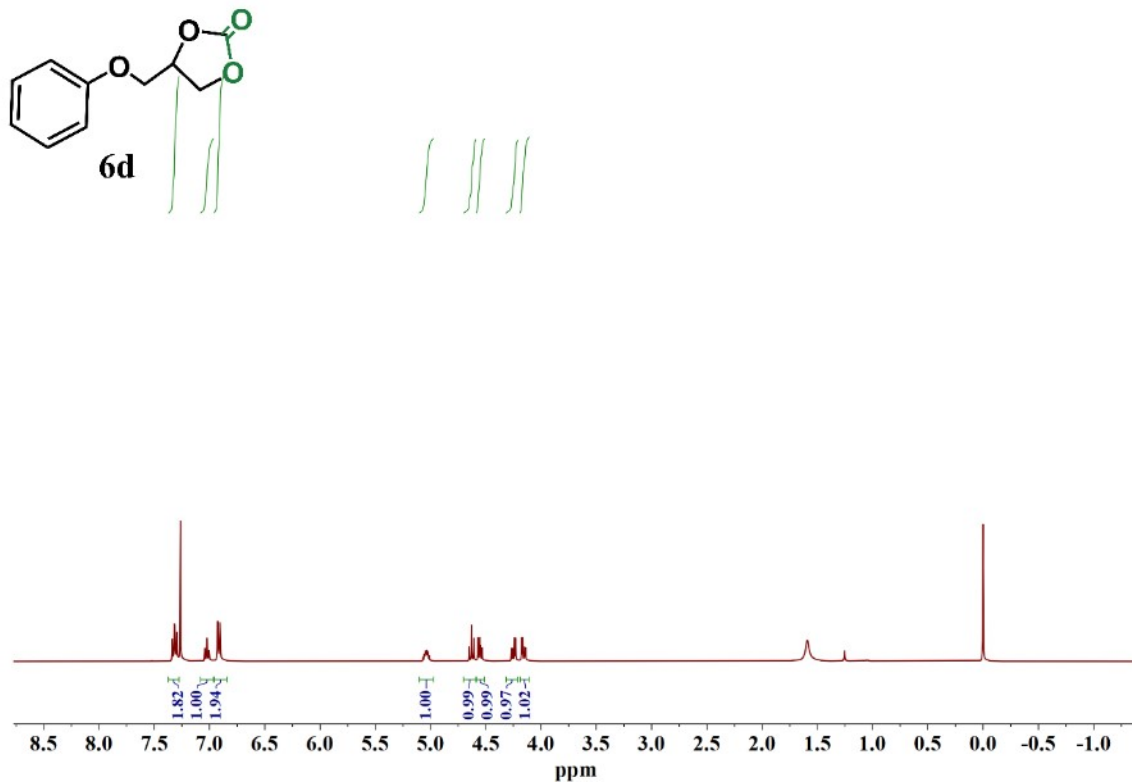

Fig. S36.  $^1\text{H}$  NMR spectrum of **6d** (400 MHz, DMSO, 298 K).

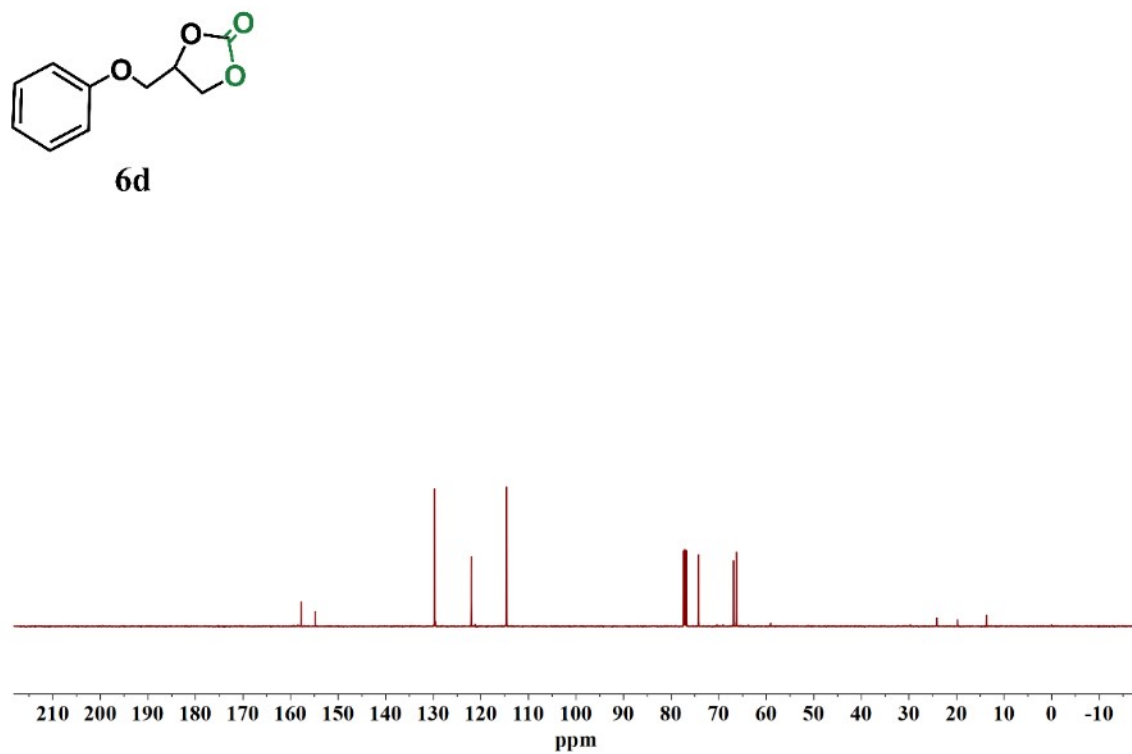

Fig. S37.  $^{13}\text{C}$  NMR spectrum of **6d** (126 MHz, DMSO, 298 K).



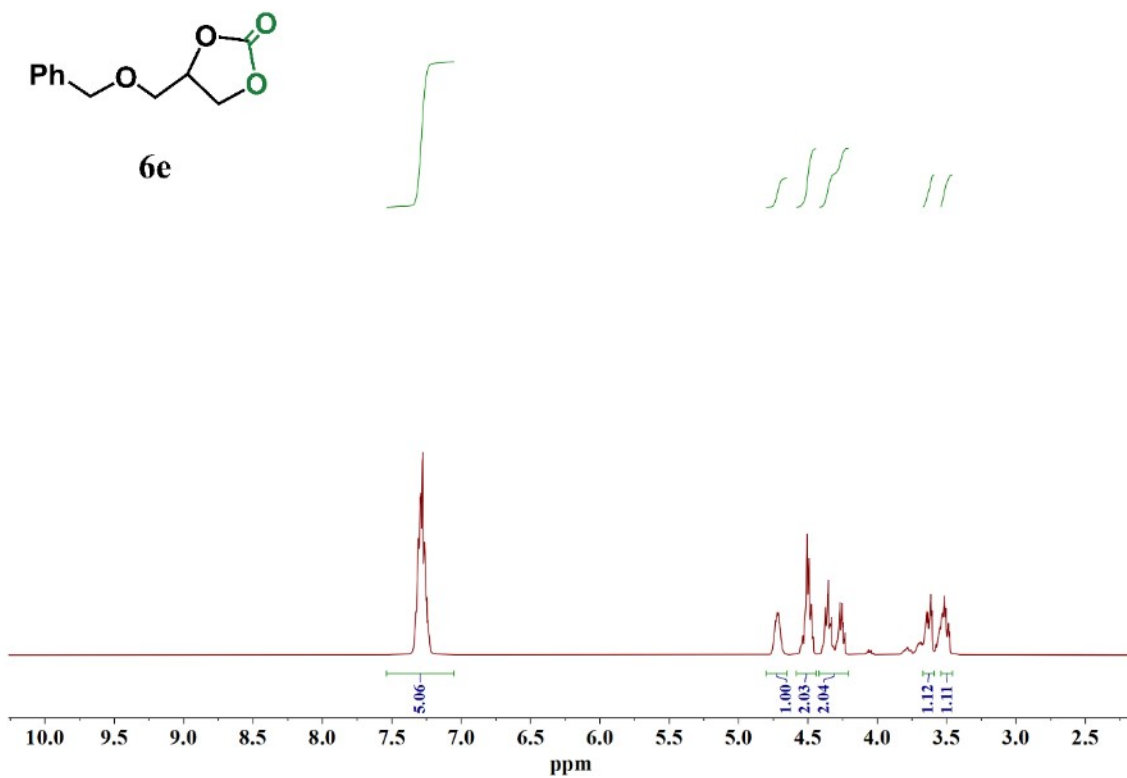

Fig. S38.  $^1\text{H}$  NMR spectrum of **6e** (400 MHz,  $\text{CDCl}_3$ , 298 K).

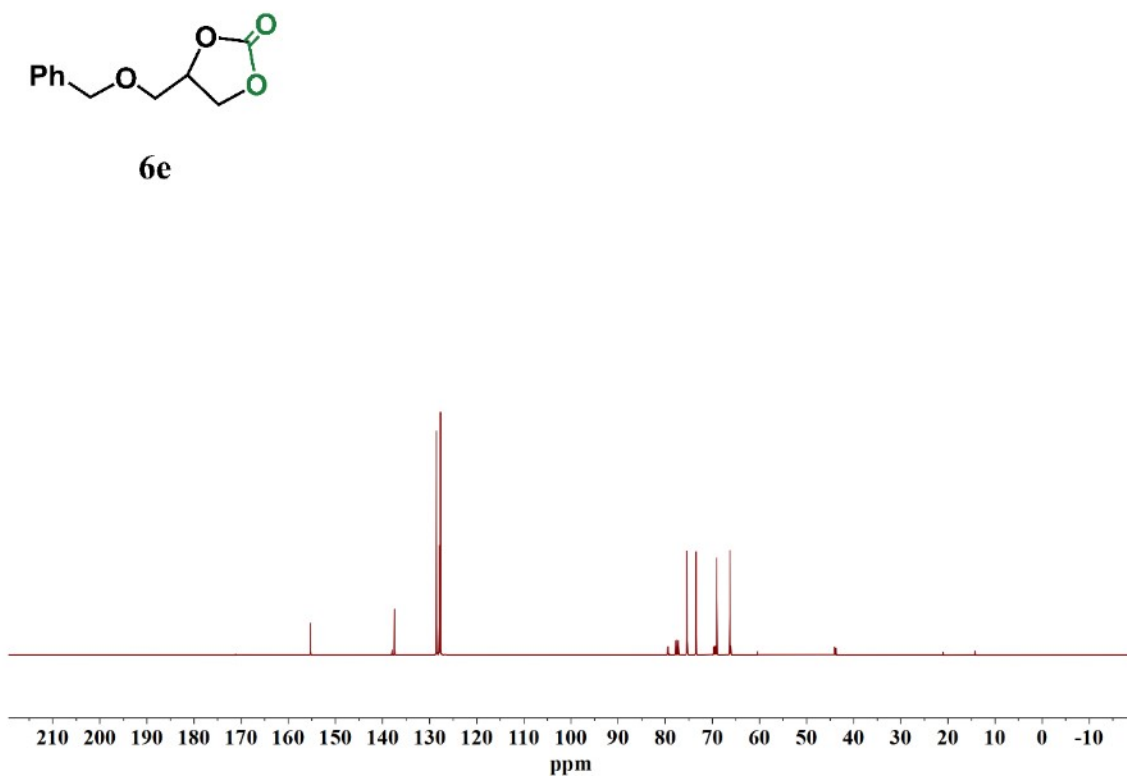

Fig. S39.  $^{13}\text{C}$  NMR spectrum of **6e** (126 MHz,  $\text{CDCl}_3$ , 298 K).

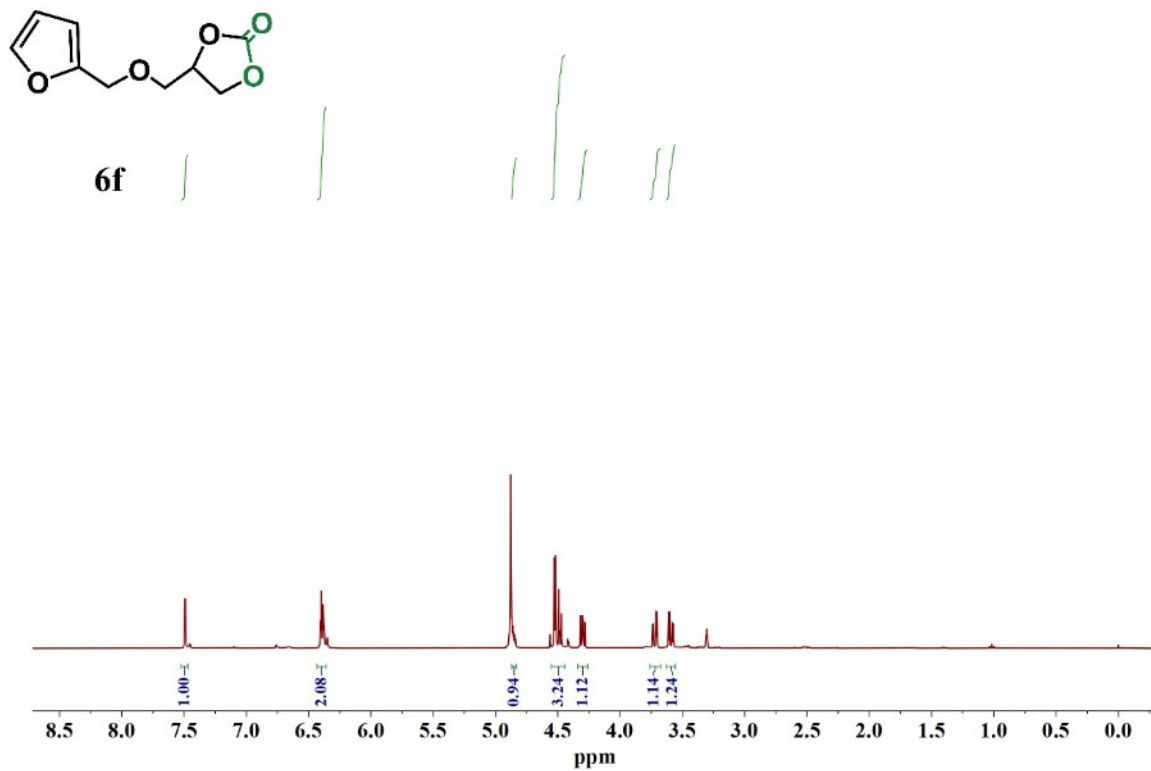

Fig. S40.  $^1\text{H}$  NMR spectrum of **6f** (400 MHz,  $\text{CDCl}_3$ , 298 K).

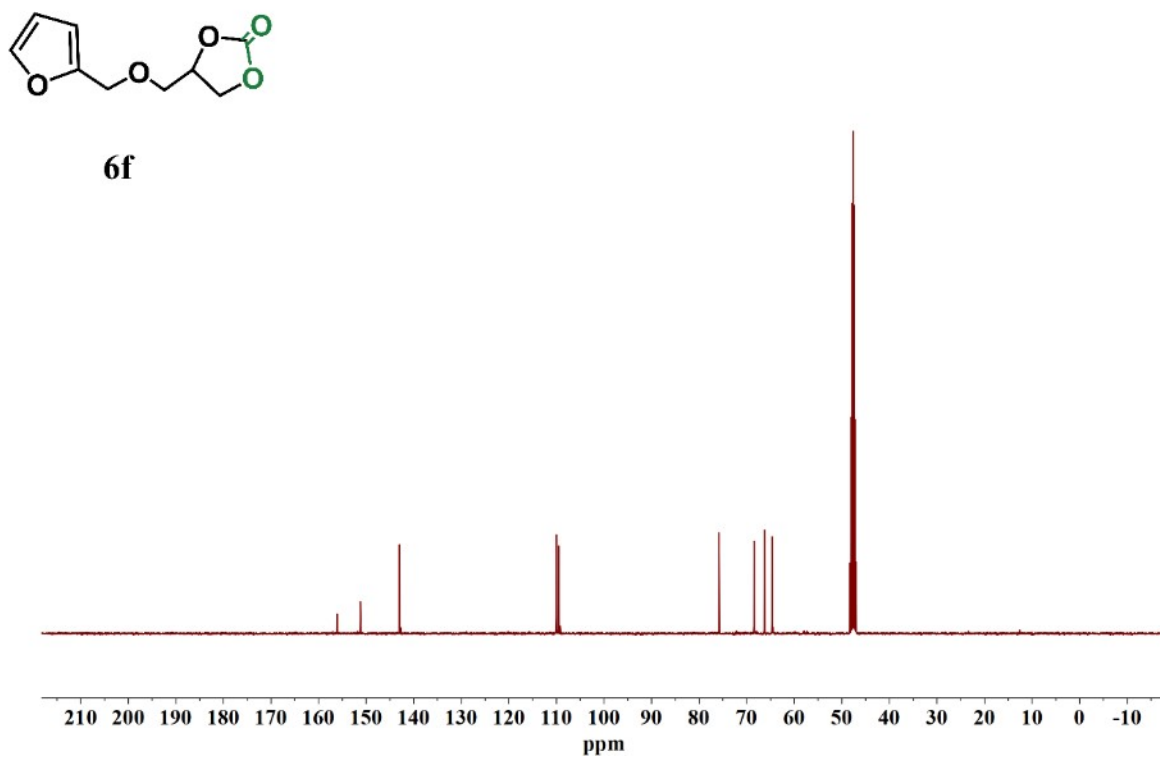

Fig. S41.  $^{13}\text{C}$  NMR spectrum of **6f** (126 MHz,  $\text{CDCl}_3$ , 298 K).

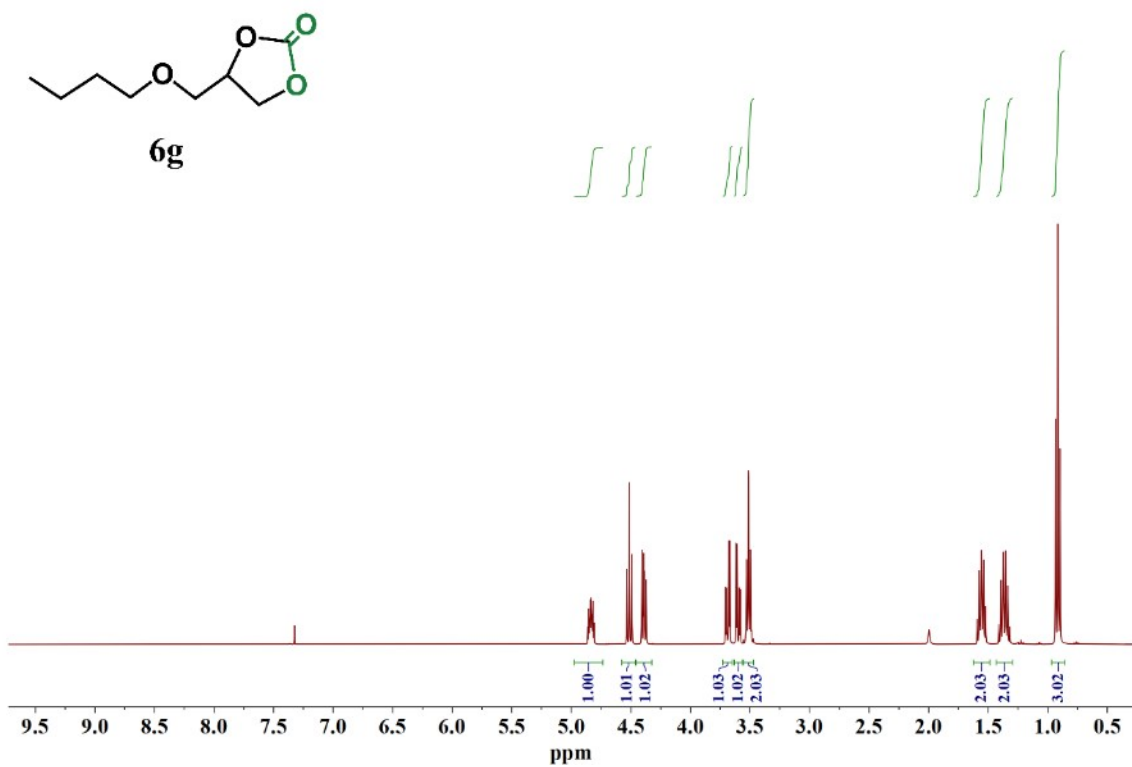

Fig. S42. <sup>1</sup>H NMR spectrum of **6g** (400 MHz, CDCl<sub>3</sub>, 298 K).

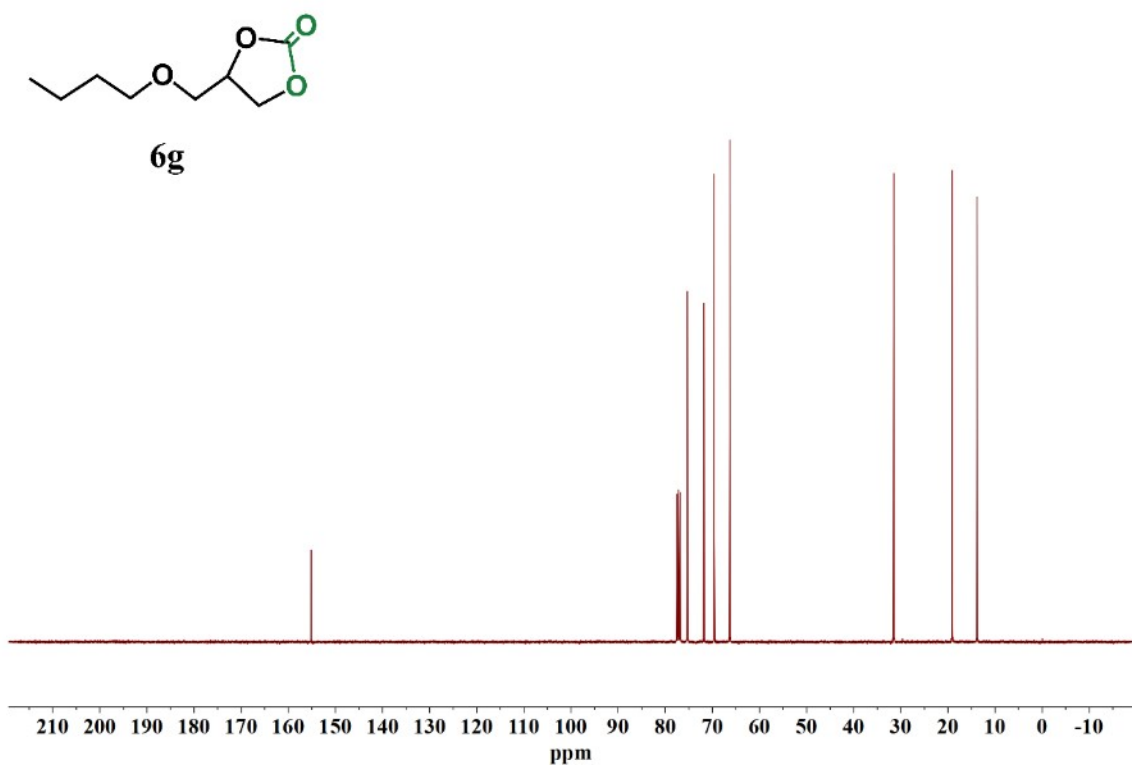

Fig. S43. <sup>13</sup>C NMR spectrum of **6g** (126 MHz, CDCl<sub>3</sub>, 298 K).

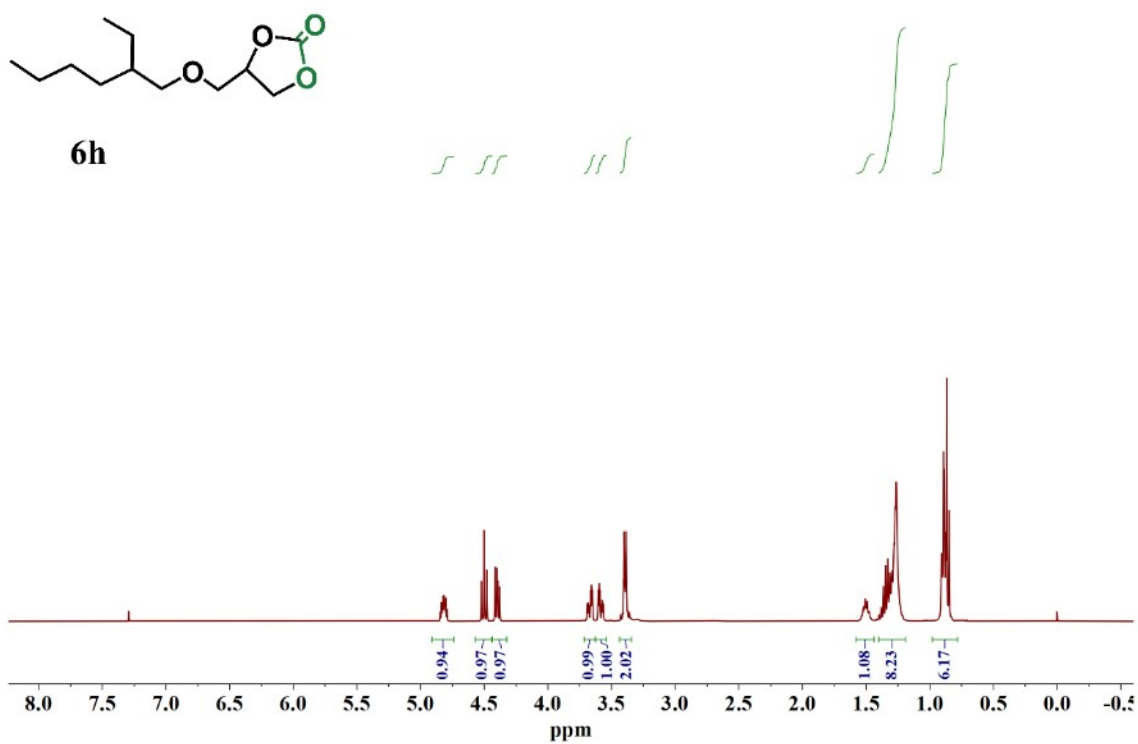

Fig. S44.  $^1\text{H}$  NMR spectrum of **6h** (400 MHz,  $\text{CDCl}_3$ , 298 K).

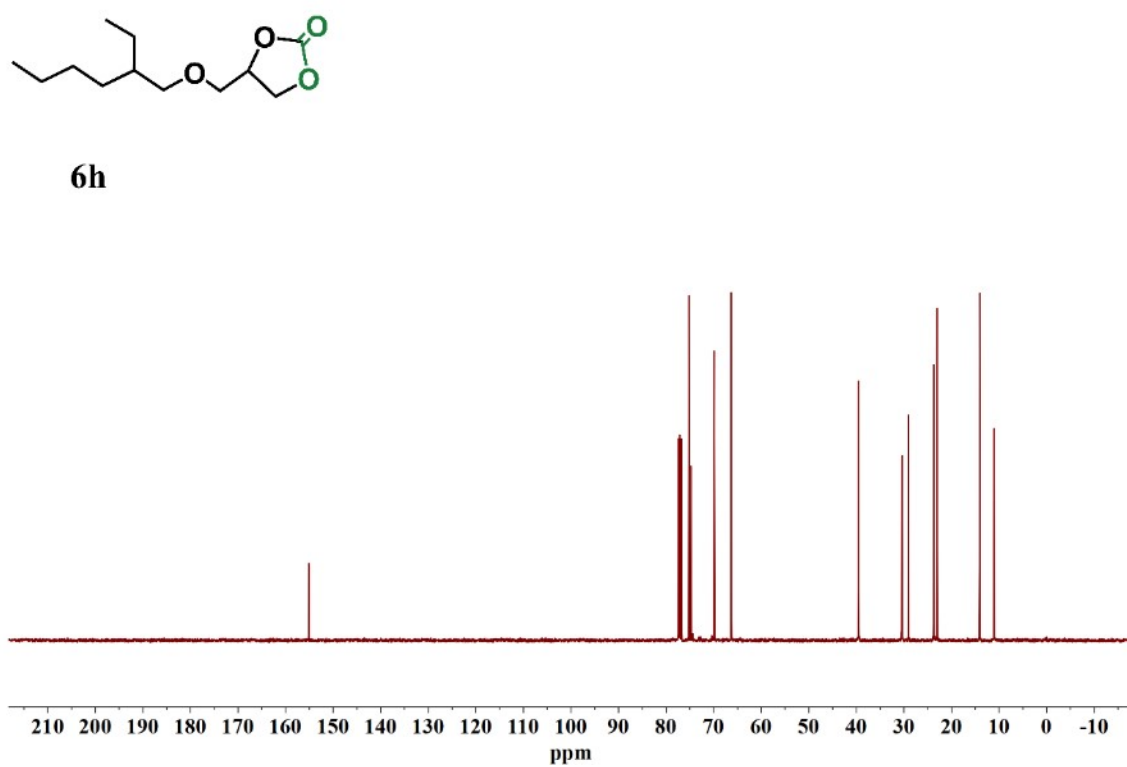

Fig. S45.  $^{13}\text{C}$  NMR spectrum of **6h** (126 MHz,  $\text{CDCl}_3$ , 298 K).

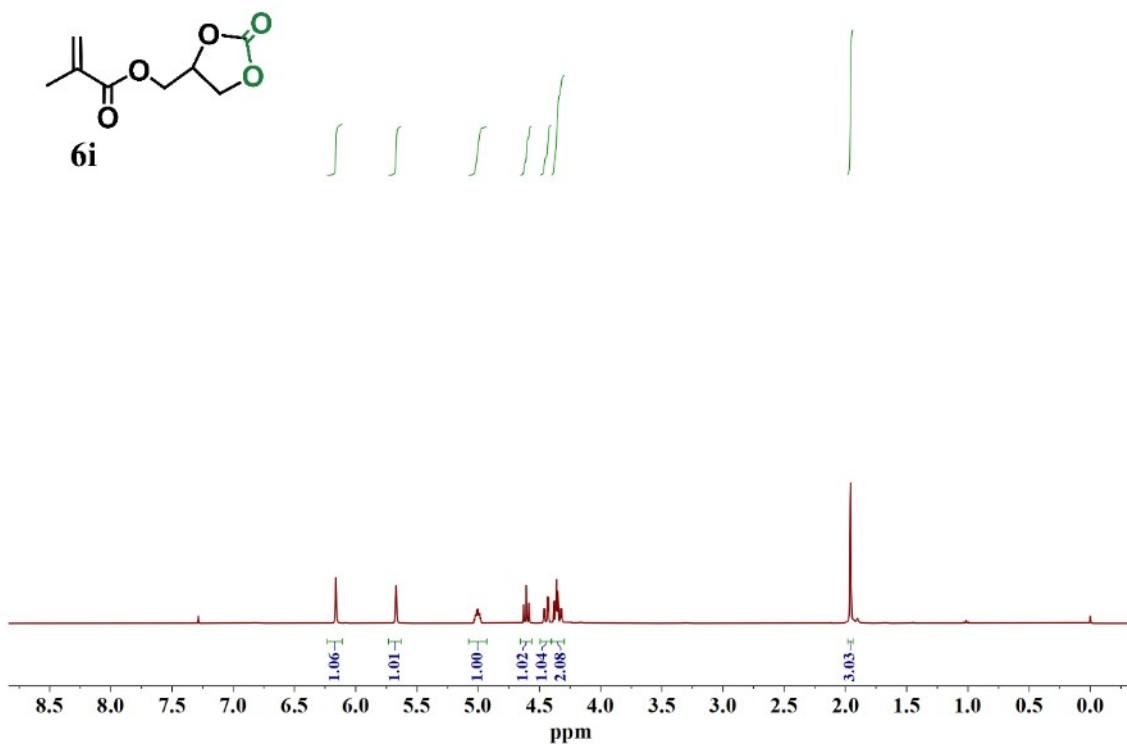

Fig. S46. <sup>1</sup>H NMR spectrum of **6i** (400 MHz, CDCl<sub>3</sub>, 298 K).

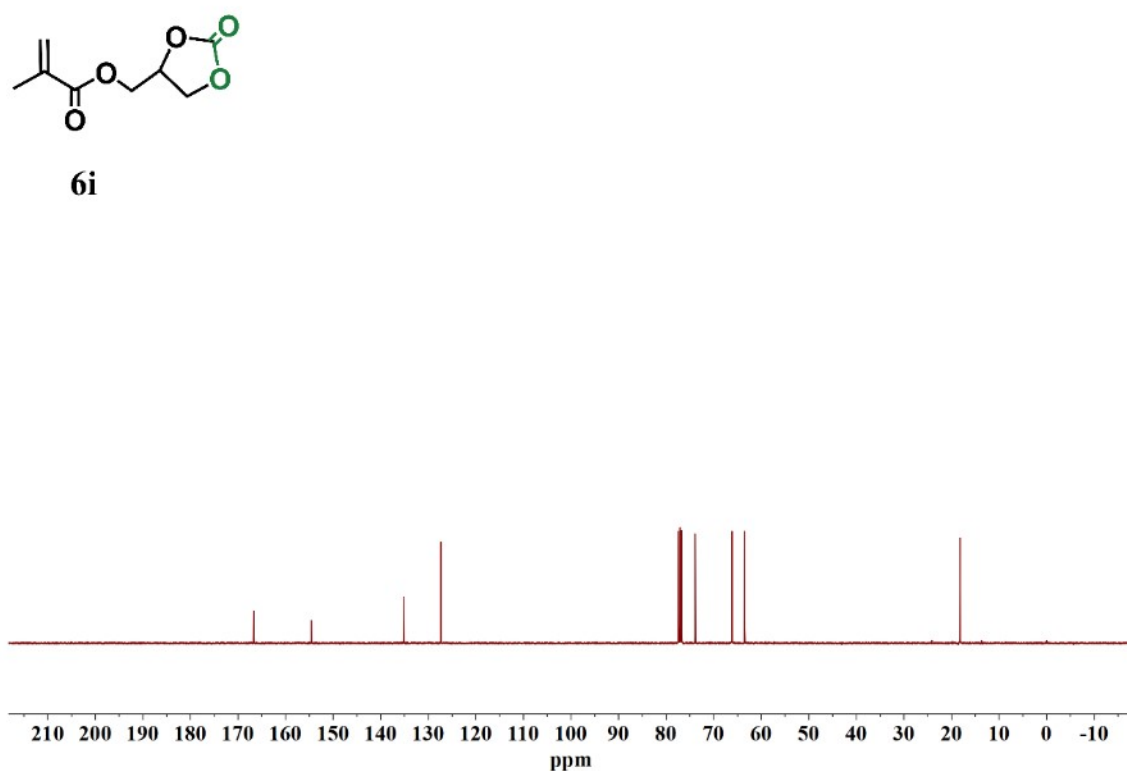

Fig. S47. <sup>13</sup>C NMR spectrum of **6i** (126 MHz, CDCl<sub>3</sub>, 298 K).

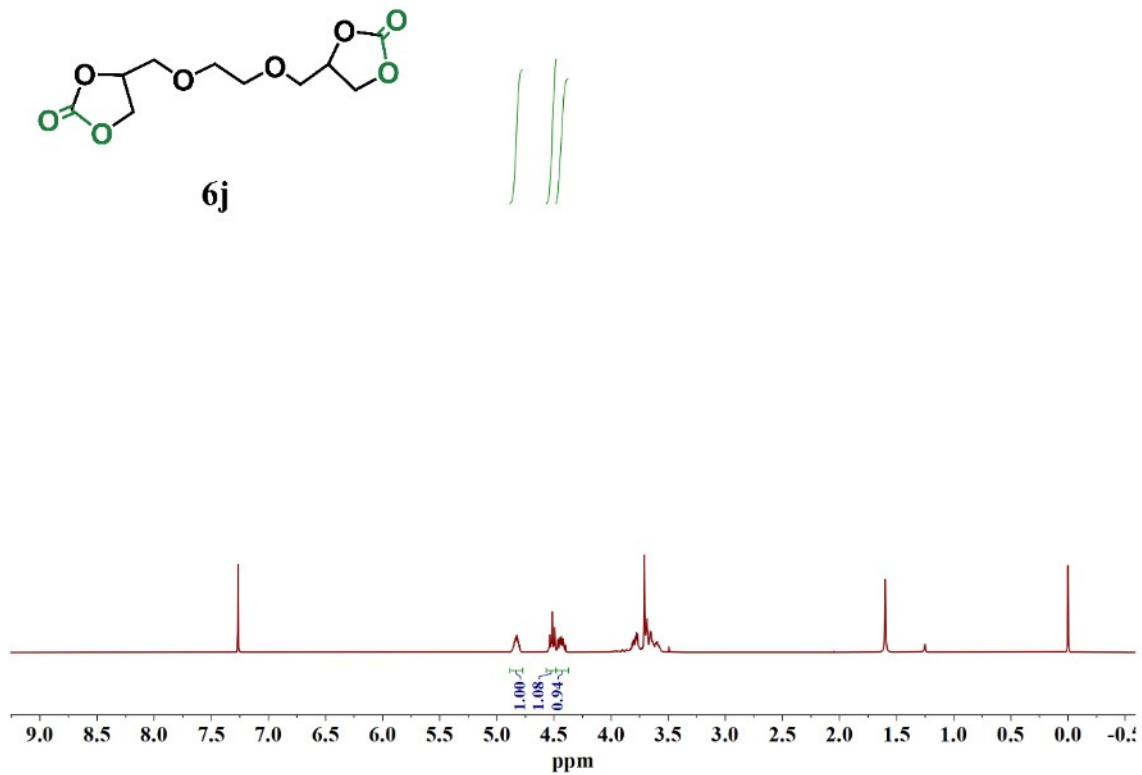

Fig. S48. <sup>1</sup>H NMR spectrum of **6j** (400 MHz, CDCl<sub>3</sub>, 298 K).

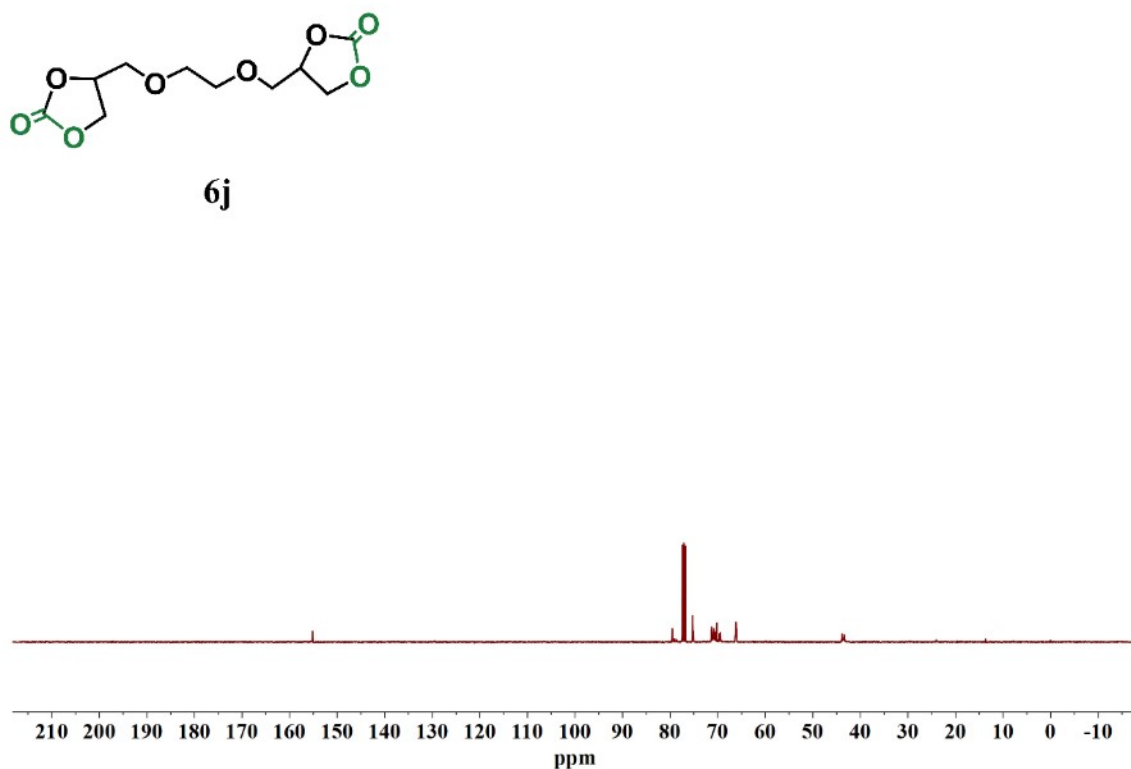

Fig. S49. <sup>13</sup>C NMR spectrum of **6j** (126 MHz, CDCl<sub>3</sub>, 298 K).

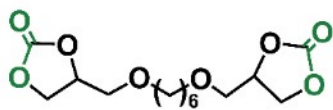

**6k**

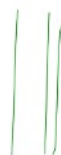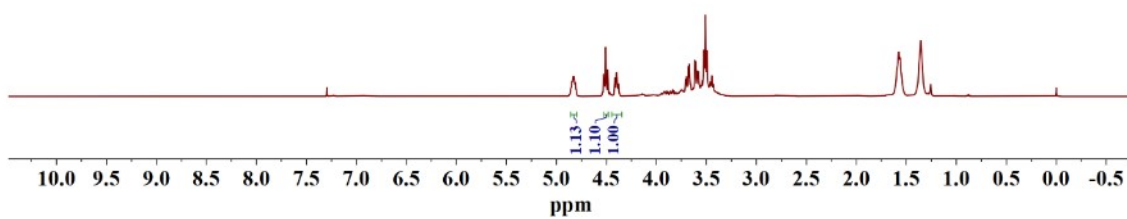

Fig. S50.  $^1\text{H}$  NMR spectrum of **6k** (400 MHz,  $\text{CDCl}_3$ , 298 K).

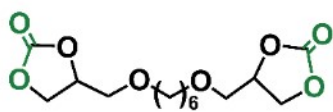

**6k**

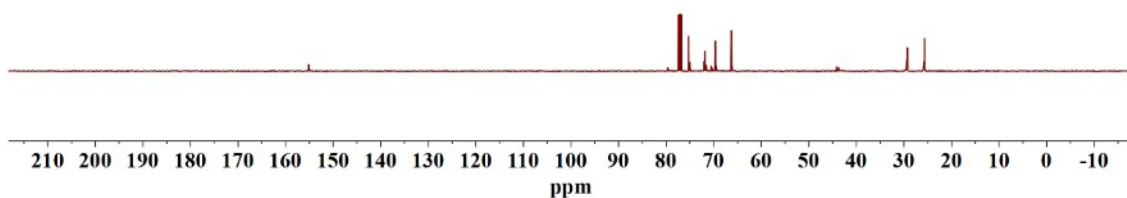

Fig. S51.  $^{13}\text{C}$  NMR spectrum of **6k** (126 MHz,  $\text{CDCl}_3$ , 298 K).

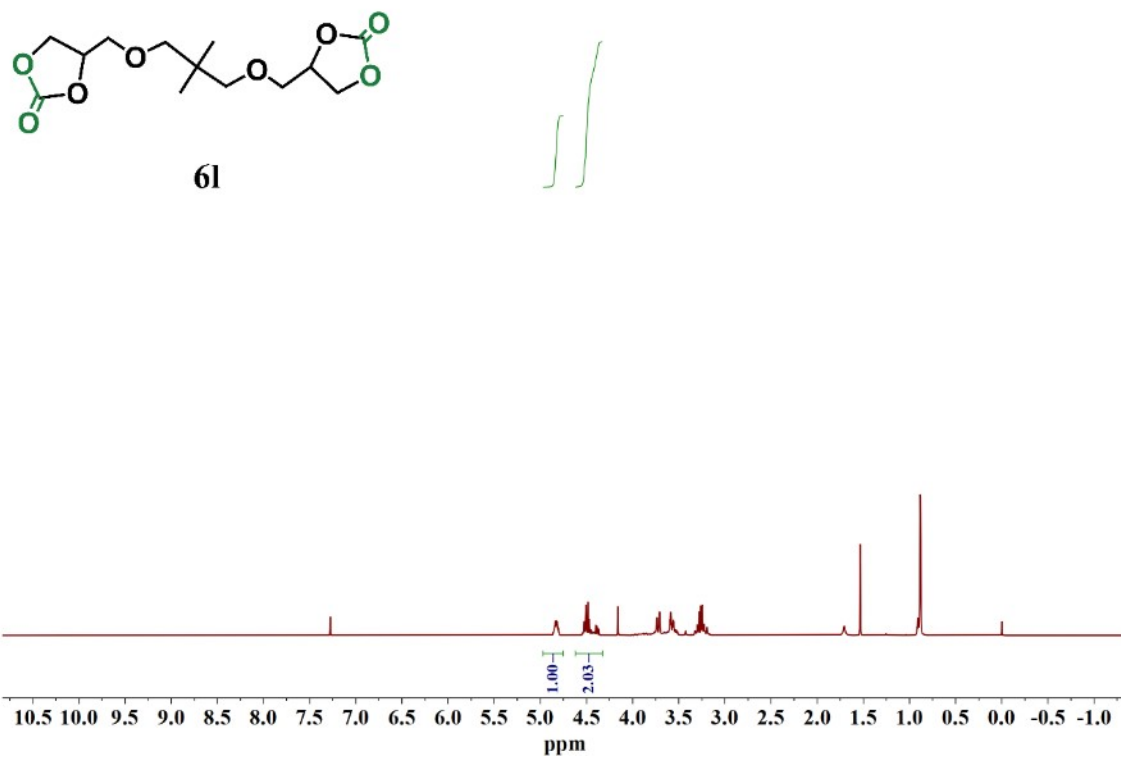

Fig. S52. <sup>1</sup>H NMR spectrum of **61** (400 MHz, CDCl<sub>3</sub>, 298 K).

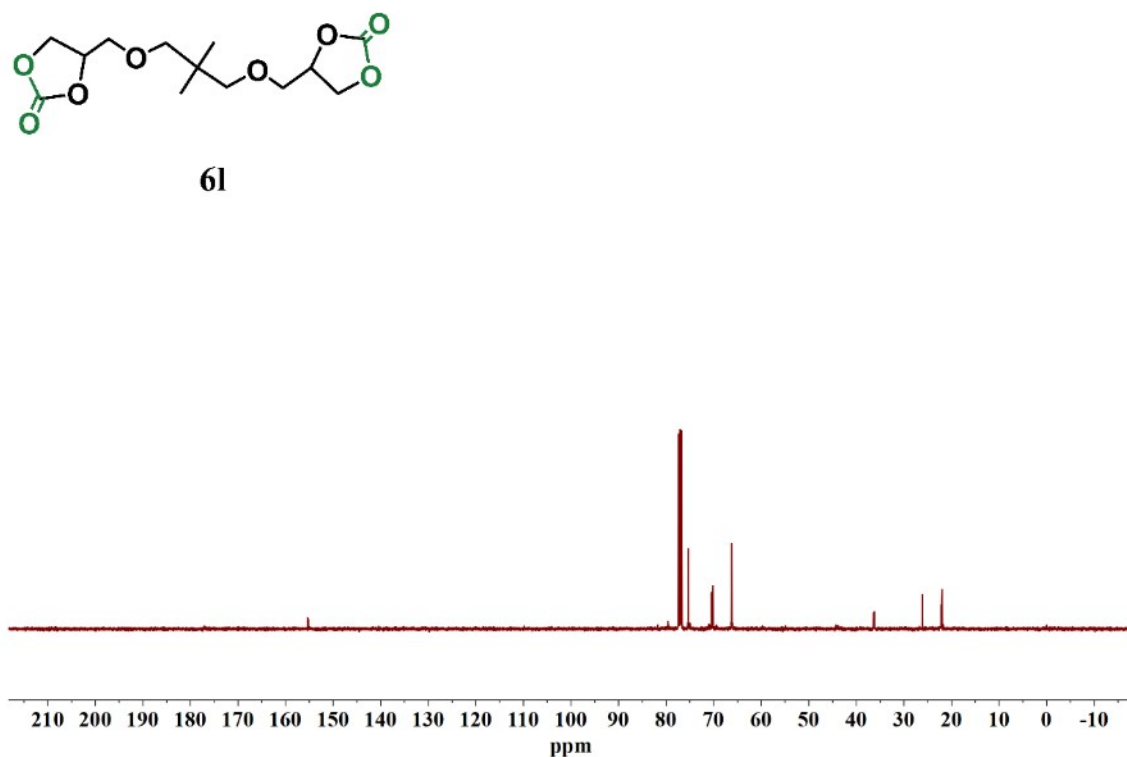

Fig. S53. <sup>13</sup>C NMR spectrum of **61** (126 MHz, CDCl<sub>3</sub>, 298 K).



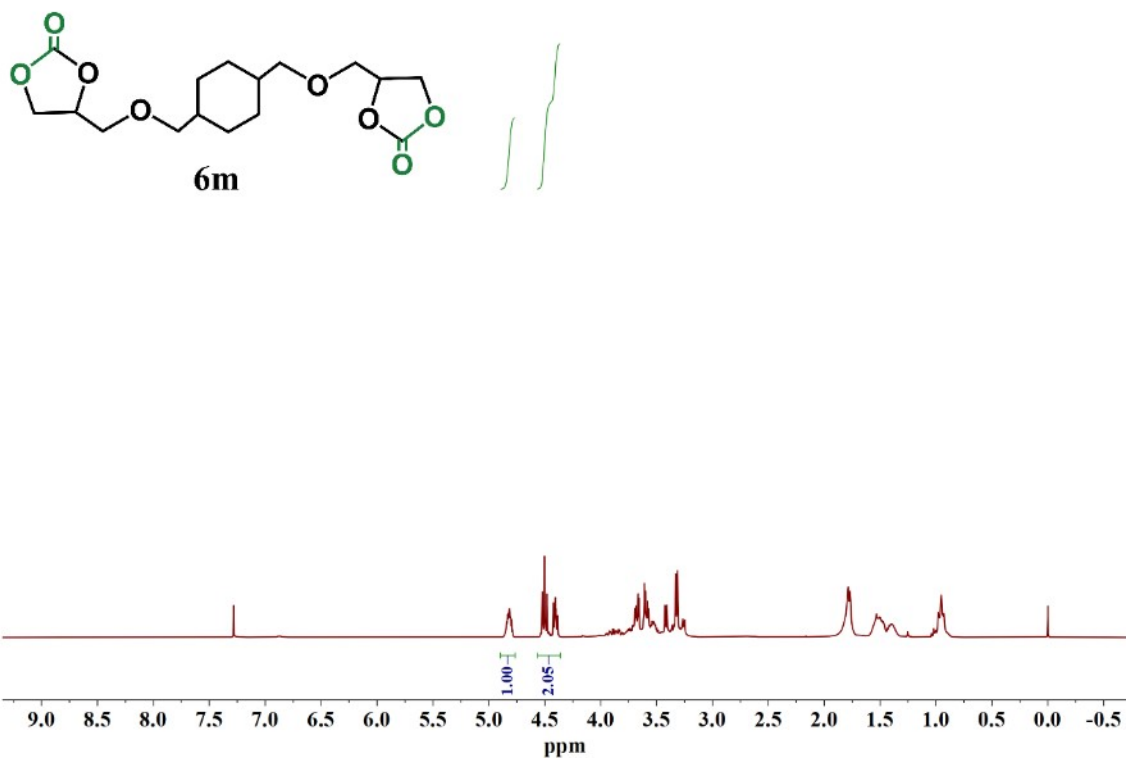

Fig. S54.  $^1\text{H}$  NMR spectrum of **6m** (400 MHz,  $\text{CDCl}_3$ , 298 K).

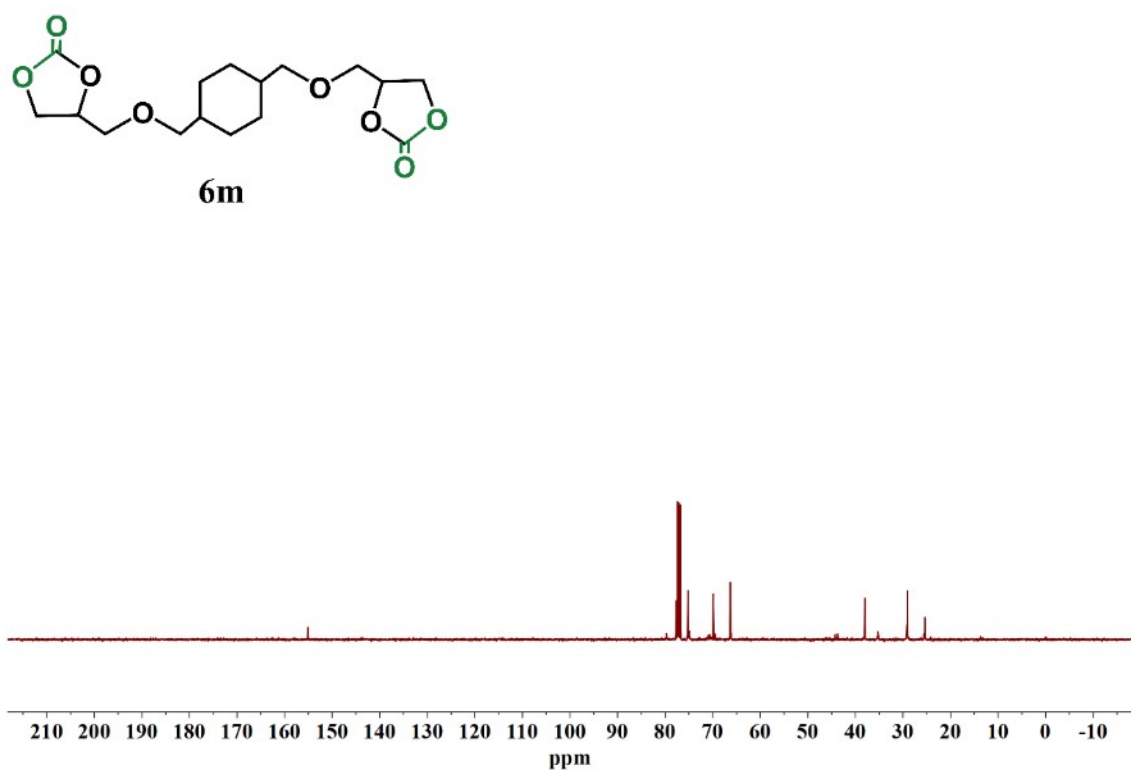

Fig. S55.  $^{13}\text{C}$  NMR spectrum of **6m** (126 MHz,  $\text{CDCl}_3$ , 298 K).

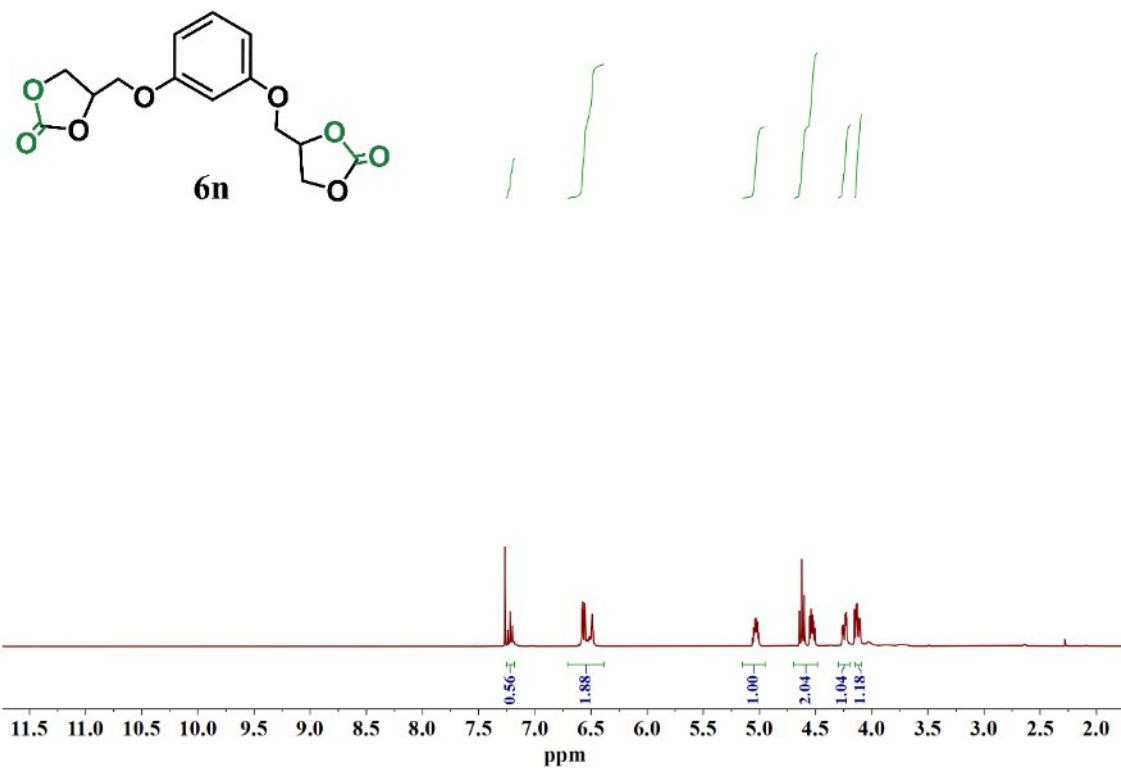

Fig. S56.  $^1\text{H}$  NMR spectrum of **6n** (400 MHz,  $\text{CDCl}_3$ , 298 K).

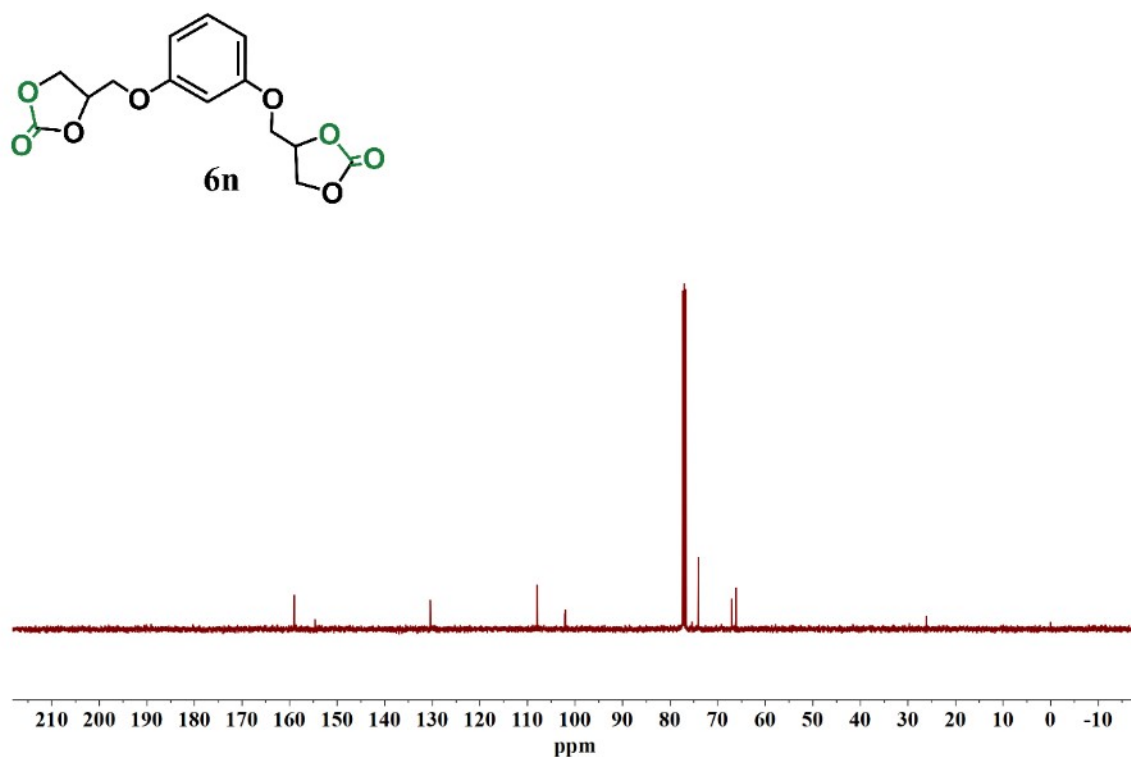

Fig. S57.  $^{13}\text{C}$  NMR spectrum of **6n** (126 MHz,  $\text{CDCl}_3$ , 298 K).

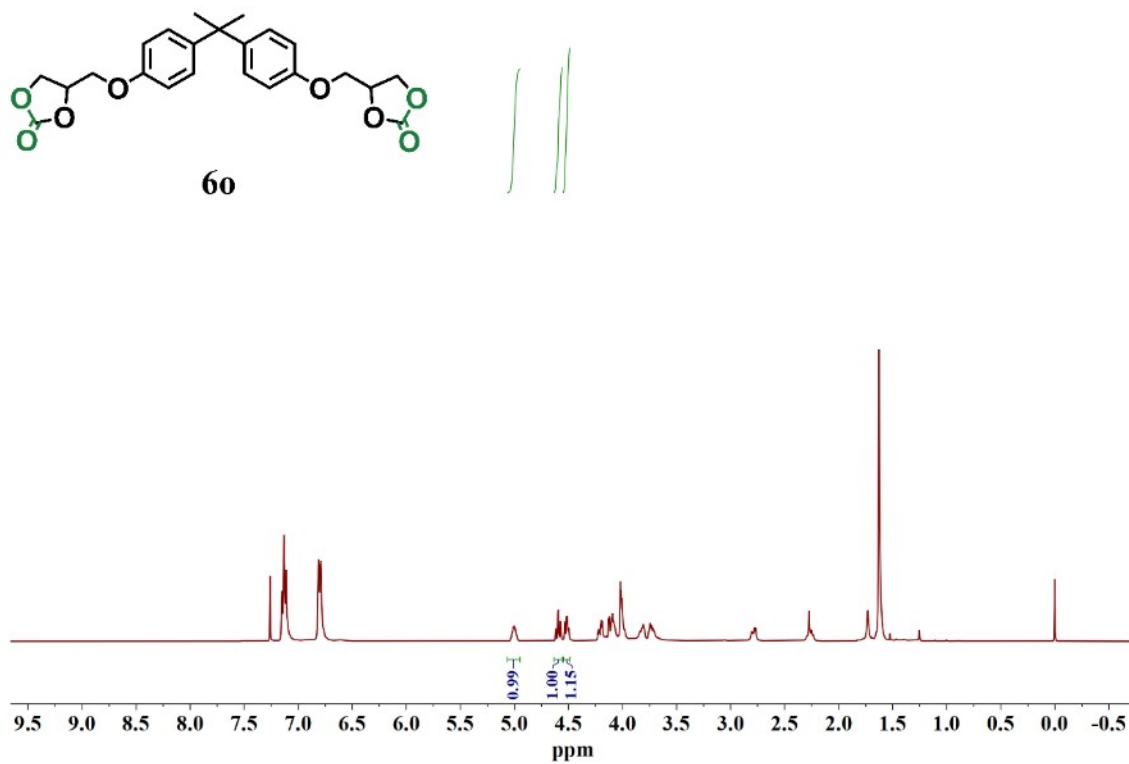

Fig. S58.  $^1\text{H}$  NMR spectrum of **60** (400 MHz,  $\text{CDCl}_3$ , 298 K).

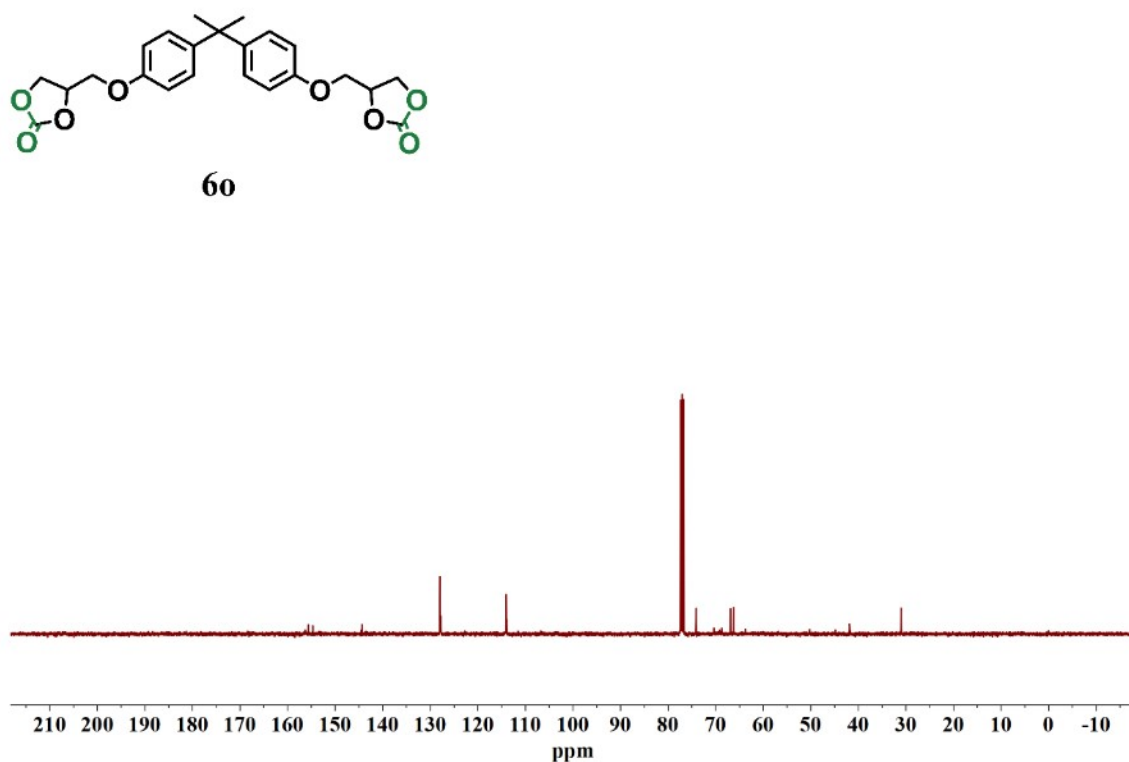

Fig. S59.  $^{13}\text{C}$  NMR spectrum of **60** (126 MHz,  $\text{CDCl}_3$ , 298 K).

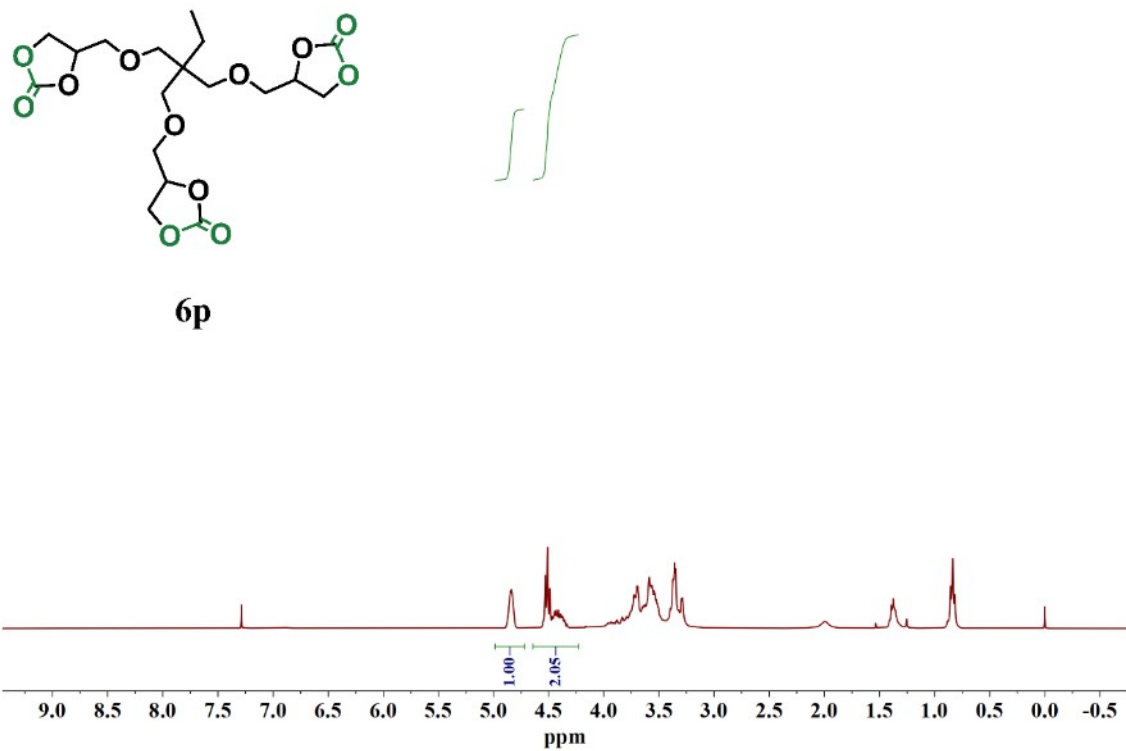

Fig. S60. <sup>1</sup>H NMR spectrum of **6p** (400 MHz, CDCl<sub>3</sub>, 298 K).

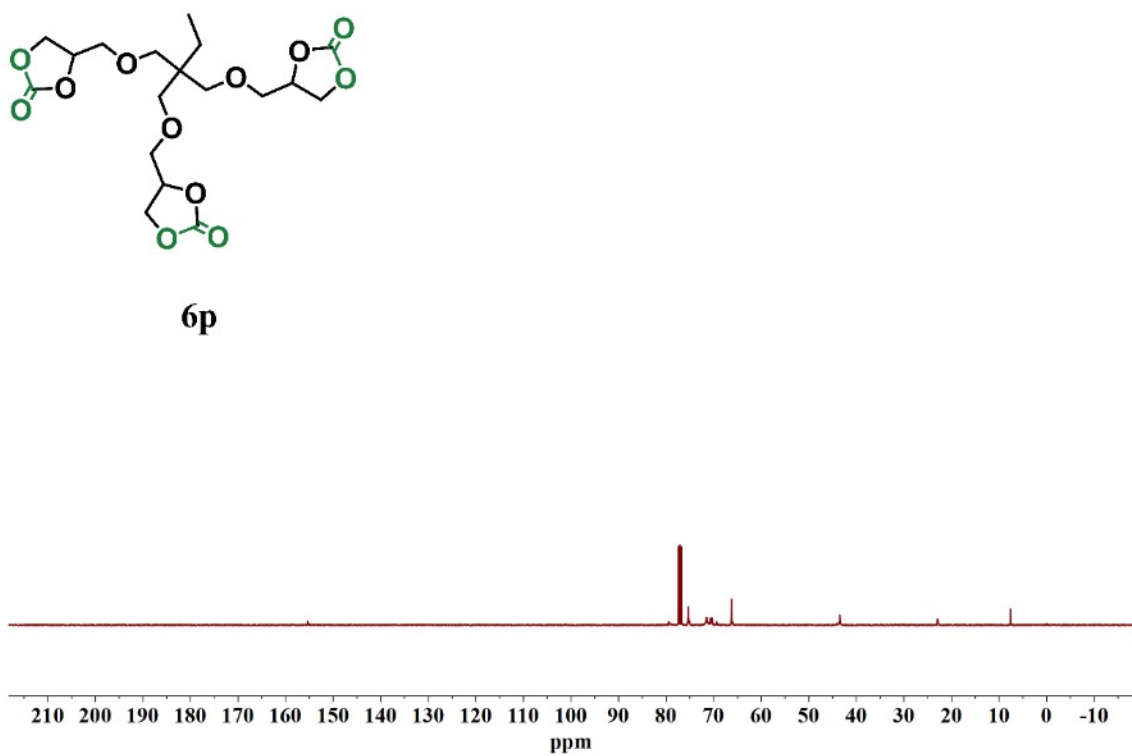

Fig. S61. <sup>13</sup>C NMR spectrum of **6p** (126 MHz, CDCl<sub>3</sub>, 298 K).

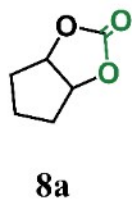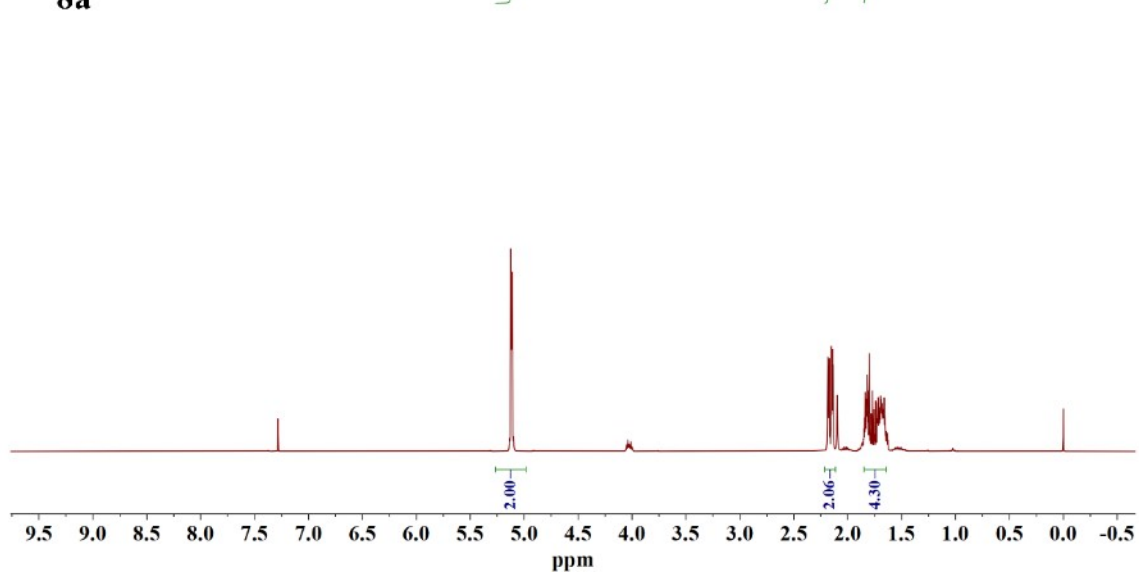

Fig. S62. <sup>1</sup>H NMR spectrum of **8a** (400 MHz, CDCl<sub>3</sub>, 298 K).

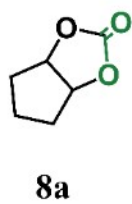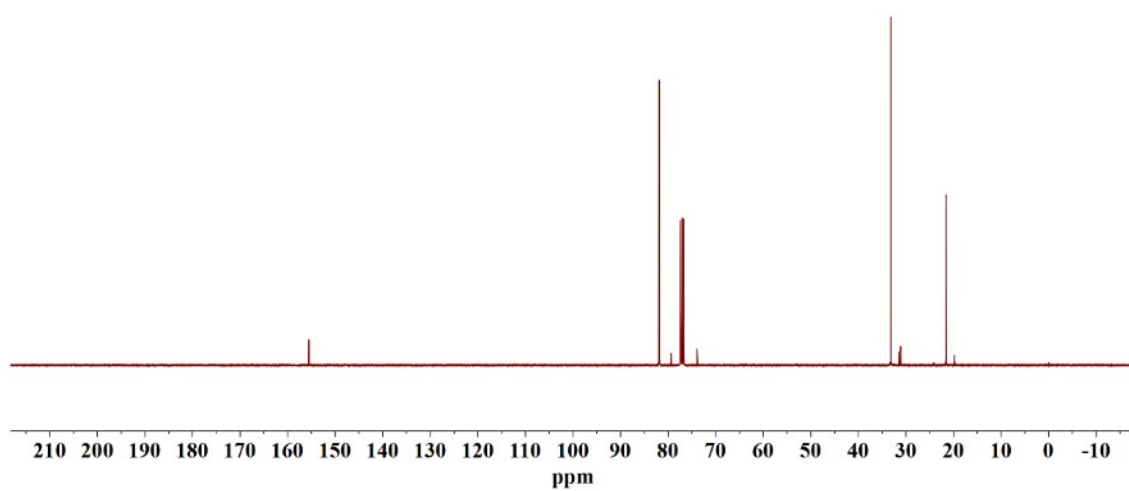

Fig. S63. <sup>13</sup>C NMR spectrum of **8a** (126 MHz, CDCl<sub>3</sub>, 298 K).

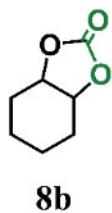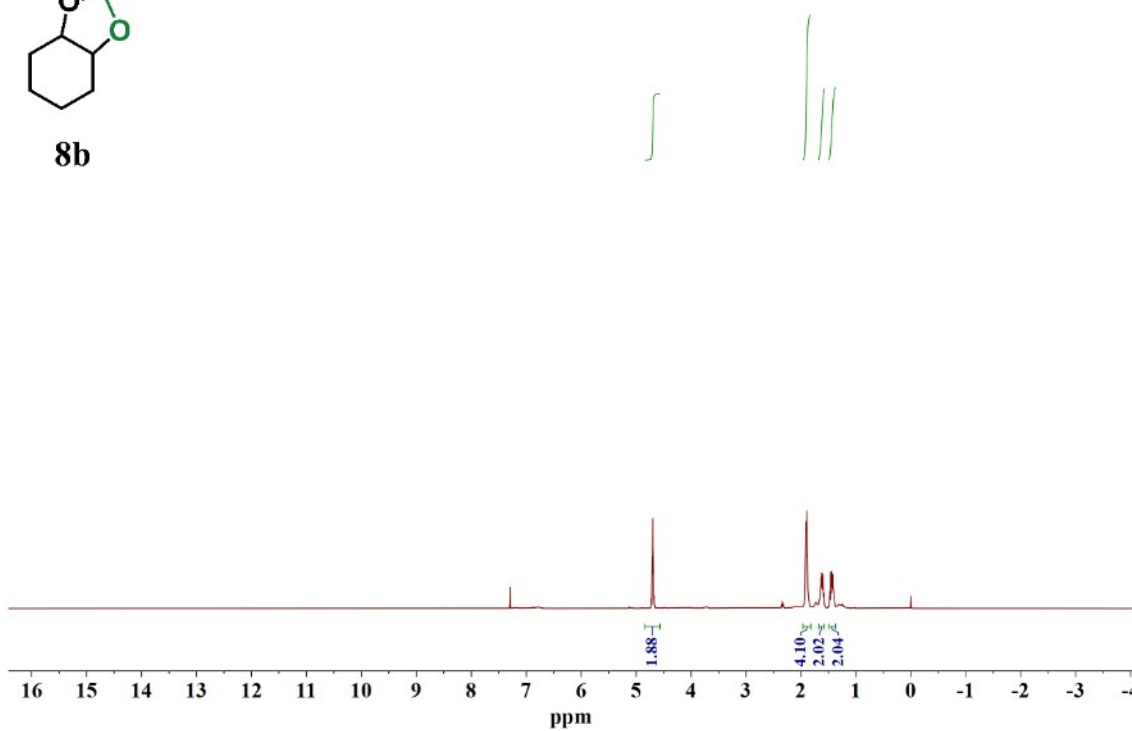

Fig. S64. <sup>1</sup>H NMR spectrum of **8b** (400 MHz, CDCl<sub>3</sub>, 298 K).

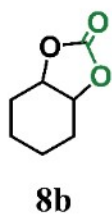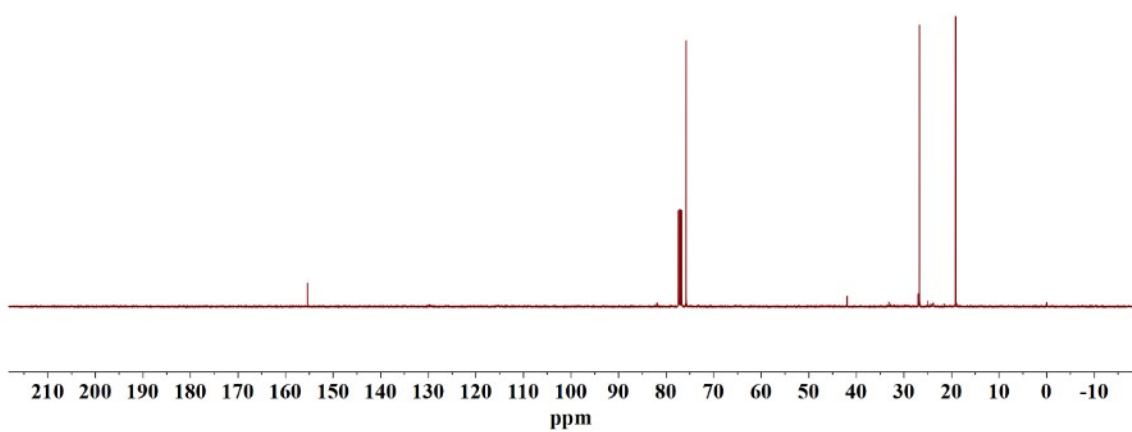

Fig. S65. <sup>13</sup>C NMR spectrum of **8b** (126 MHz, CDCl<sub>3</sub>, 298 K).

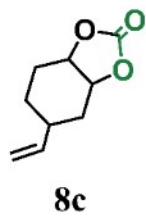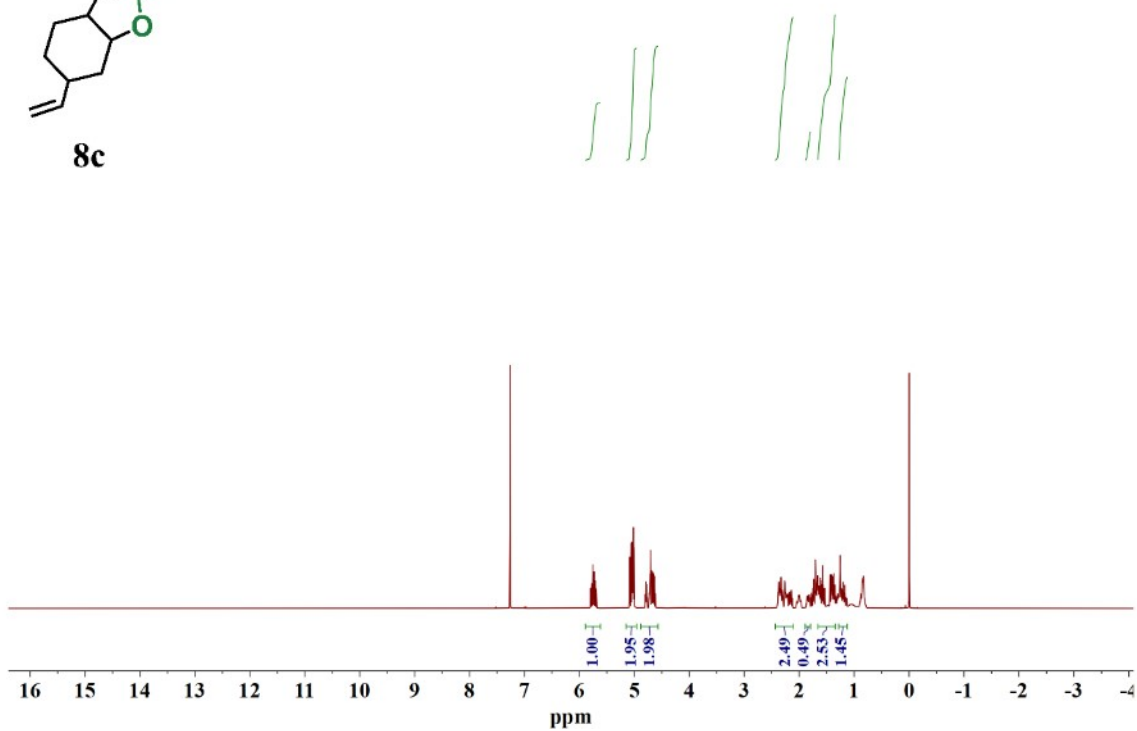

Fig. S66.  $^1\text{H}$  NMR spectrum of **8c** (400 MHz,  $\text{CDCl}_3$ , 298 K).

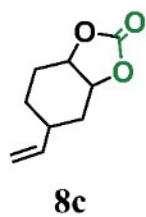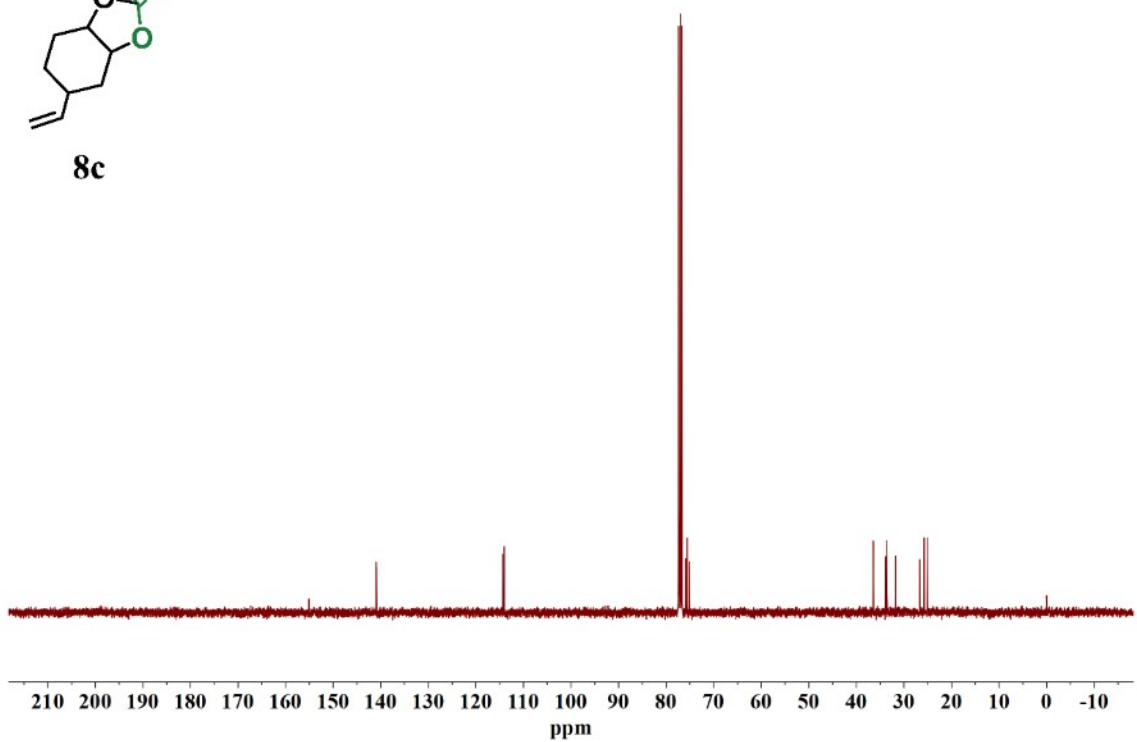

Fig. S67.  $^{13}\text{C}$  NMR spectrum of **8c** (126 MHz,  $\text{CDCl}_3$ , 298 K).

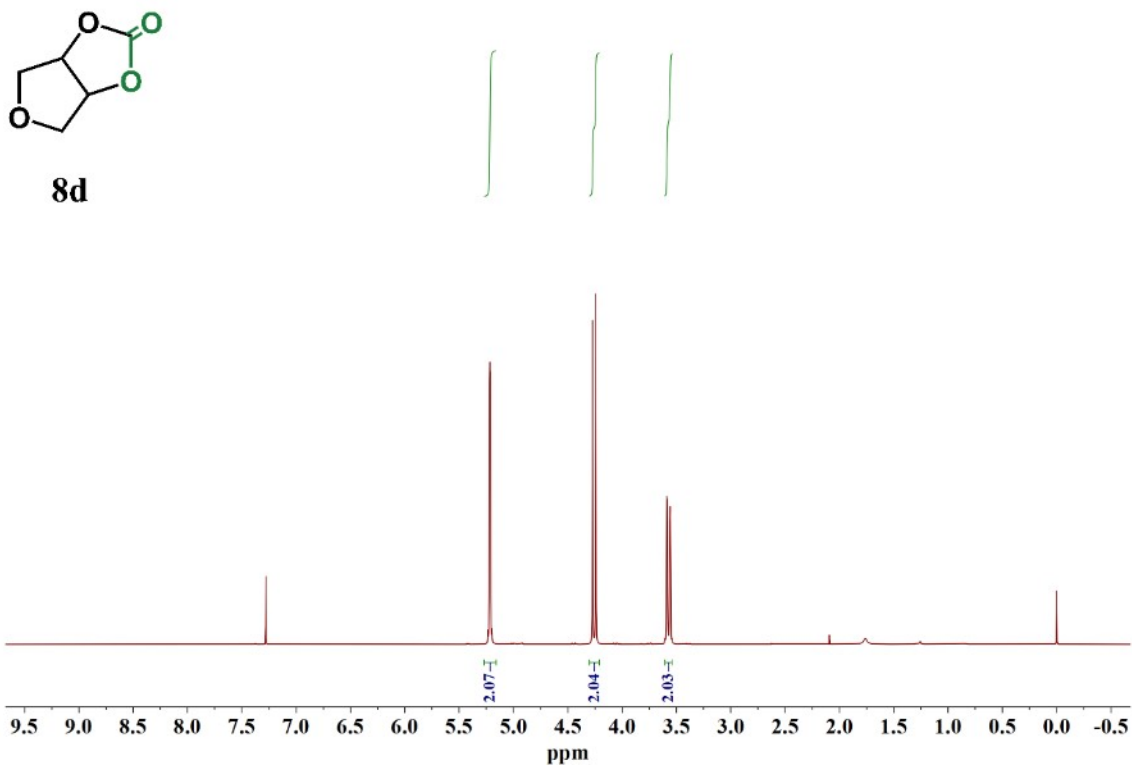

Fig. S68.  $^1\text{H}$  NMR spectrum of **8d** (400 MHz,  $\text{CDCl}_3$ , 298 K).

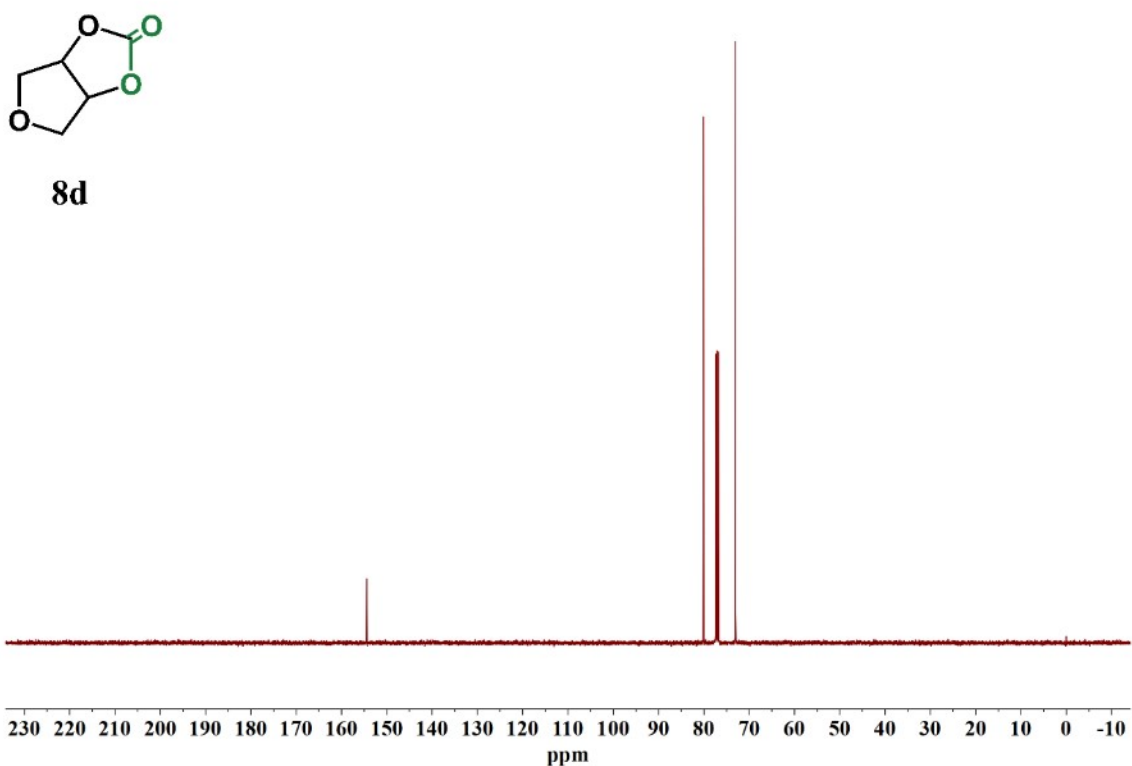

Fig. S69.  $^{13}\text{C}$  NMR spectrum of **8d** (126 MHz,  $\text{CDCl}_3$ , 298 K).



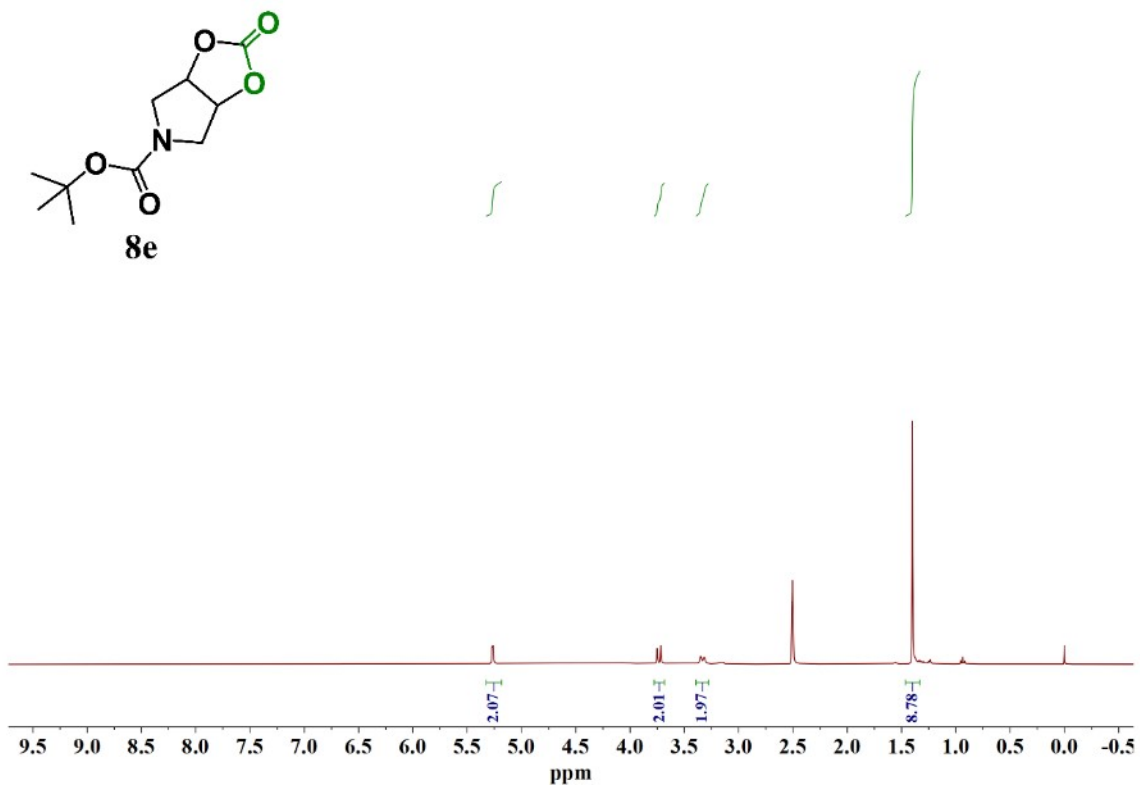

Fig. S70.  $^1\text{H}$  NMR spectrum of **8e** (400 MHz,  $\text{CDCl}_3$ , 298 K).

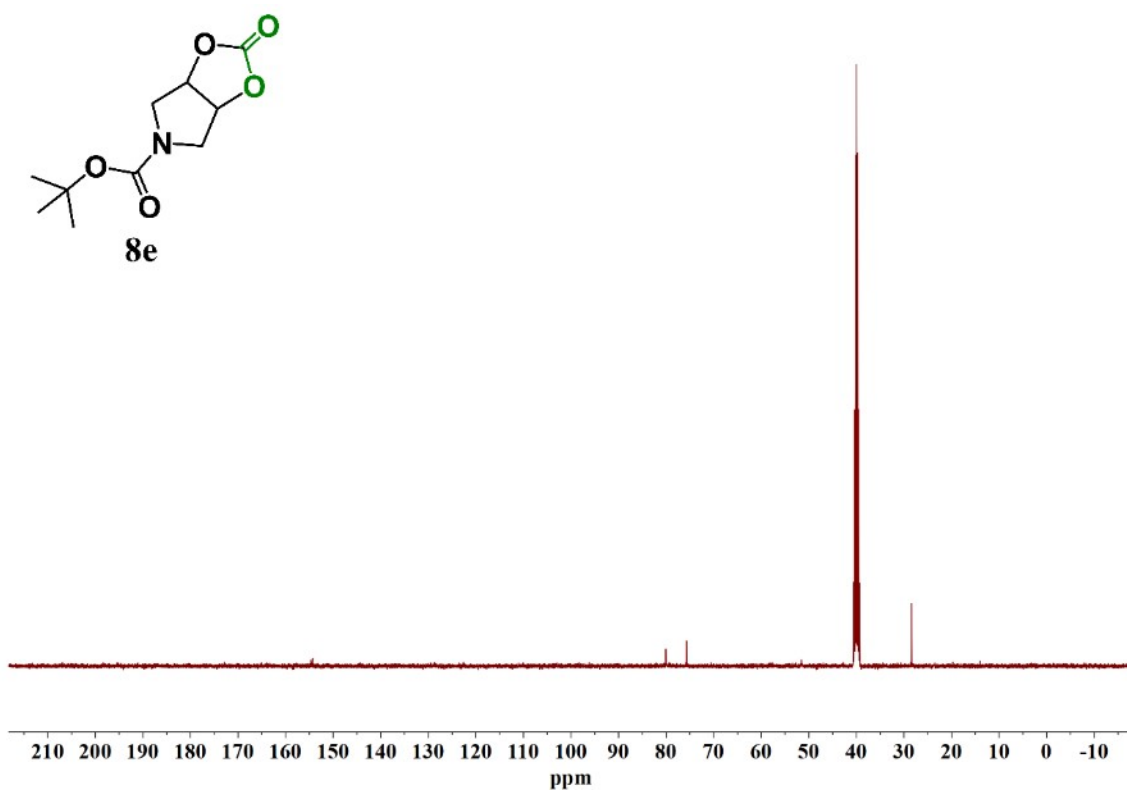

Fig. S71.  $^{13}\text{C}$  NMR spectrum of **8e** (126 MHz,  $\text{CDCl}_3$ , 298 K).

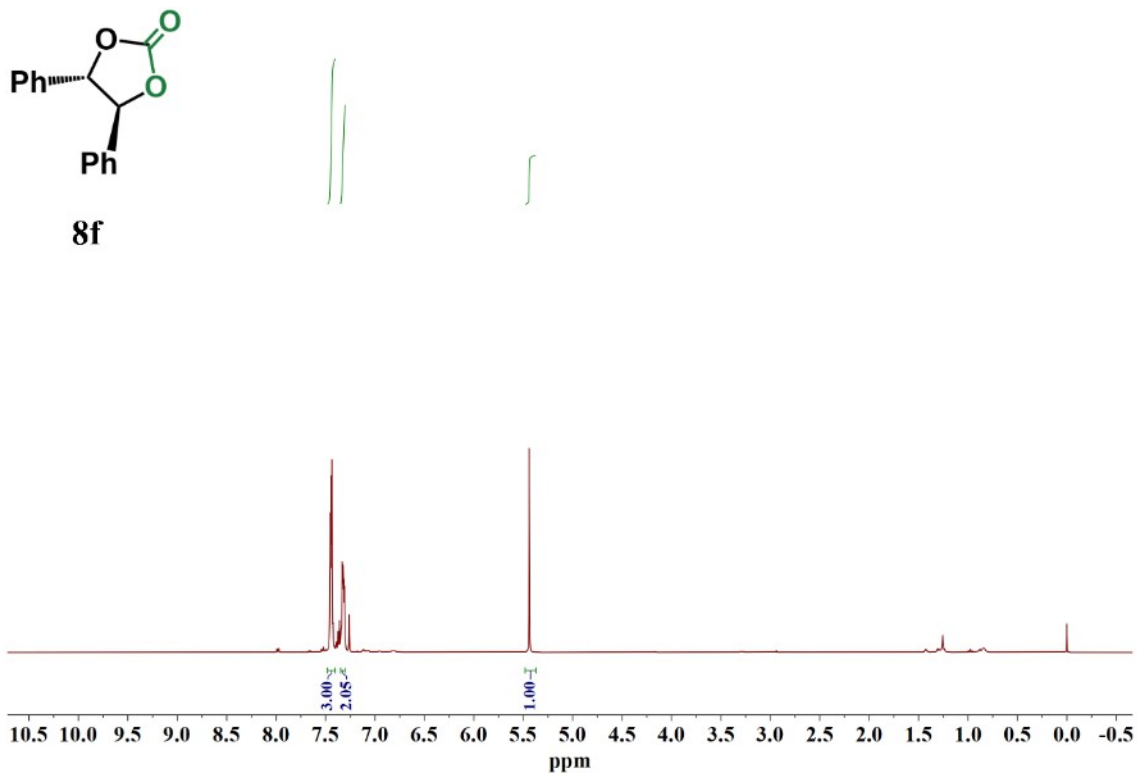

Fig. S72. <sup>1</sup>H NMR spectrum of **8f** (400 MHz, CDCl<sub>3</sub>, 298 K).

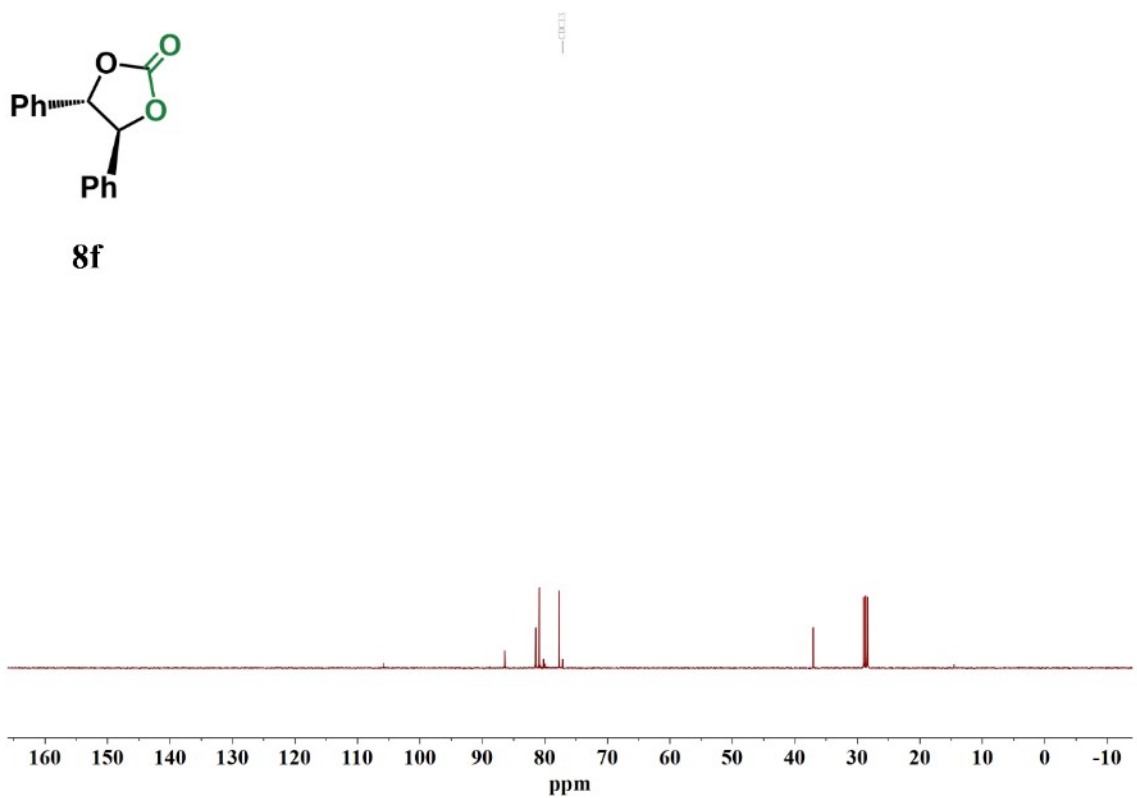

Fig. S73. <sup>13</sup>C NMR spectrum of **8f** (126 MHz, CDCl<sub>3</sub>, 298 K).
